# Supplementary material
Source: publisher figshare collection journal article supplement (https://future-science-group.figshare.com/ndownloader/files/35458748)
Supplement: Supplementary file 1 [file 35458748]

## Sheet: S1_microRNAs_measured
Spreadsheet S1: 752 known microRNAs measured in breast milk-derived EVs, and number and percent of samples in which microRNAs passed quality control (CQ). For microRNAs that passed QC in at least 50% of samples, normalized ΔCq values were calcualted.
miRNA	Number of samples passed QC	% of samples passed QC	Median -ΔCq	IQR	Mean -ΔCq	SD	Included in analyses
hsa-miR-30a-5p	75	100	14.6175	(15.62, 13.78)	14.4397	1.67792	x
hsa-miR-345-5p	73	97.3333	6.20374	(7.08, 5.64)	6.16504	1.63116	x
hsa-miR-146b-5p	72	96	14.1061	(15.08, 13.12)	13.3831	3.40178	x
hsa-miR-191-5p	72	96	12.5179	(13.03, 12.05)	11.7323	3.41236	x
hsa-miR-19b-3p	72	96	14.6752	(15.37, 13.93)	13.7895	3.55048	x
hsa-miR-223-3p	72	96	11.6517	(12.77, 10.14)	10.7447	4.57668	x
hsa-miR-30b-5p	72	96	13.9274	(15.31, 12.62)	13.2422	3.54064	x
hsa-miR-320a	72	96	12.8321	(13.37, 12.2)	12.3457	2.95342	x
hsa-miR-484	72	96	11.0825	(11.64, 10.02)	10.2647	3.03577	x
hsa-miR-106b-5p	71	94.6667	11.4628	(12.15, 10.52)	10.4829	3.5974	x
hsa-miR-146a-5p	71	94.6667	10.9237	(12.43, 9.36)	10.2618	3.47241	x
hsa-miR-203a	71	94.6667	8.11412	(8.7, 7.68)	7.67846	2.27895	x
hsa-miR-24-3p	71	94.6667	15.0798	(15.65, 14.43)	13.9092	4.12783	x
hsa-miR-29a-3p	71	94.6667	10.1527	(10.96, 9.36)	9.46448	3.02684	x
hsa-miR-30d-5p	71	94.6667	11.987	(13.17, 10.72)	11.2379	3.38365	x
hsa-miR-328-3p	71	94.6667	7.25587	(8.08, 6.76)	6.98793	2.1663	x
hsa-miR-130b-3p	70	93.3333	8.57547	(9.35, 7.78)	7.99513	2.58865	x
hsa-miR-181a-5p	70	93.3333	11.1556	(11.5, 10.47)	10.0921	3.17879	x
hsa-miR-193b-3p	70	93.3333	13.4864	(14.1, 12.37)	12.2297	4.28634	x
hsa-miR-19a-3p	70	93.3333	9.99728	(10.99, 9.07)	9.27398	3.08947	x
hsa-miR-26a-5p	70	93.3333	12.5544	(13.11, 11.33)	11.3791	3.58143	x
hsa-miR-374a-5p	70	93.3333	9.39152	(10.23, 8.44)	8.61709	2.98277	x
hsa-miR-429	70	93.3333	8.84689	(9.91, 7.4)	8.18828	2.7616	x
hsa-miR-511-5p	70	93.3333	8.90956	(9.9, 7.16)	8.04959	2.85094	x
hsa-miR-92a-3p	70	93.3333	10.0465	(10.8, 9.13)	9.23915	3.0532	x
hsa-miR-99b-5p	70	93.3333	9.25831	(9.5, 8.4)	8.39445	2.63027	x
hsa-miR-106a-5p	69	92	11.7101	(12.36, 10.75)	10.7468	3.52163	x
hsa-miR-130a-3p	69	92	6.65809	(7.59, 5.67)	6.17417	2.58466	x
hsa-miR-148a-3p	69	92	11.4058	(12.15, 10.35)	10.3192	3.57216	x
hsa-miR-152-3p	69	92	9.6918	(10.4, 8.58)	8.78601	3.05377	x
hsa-miR-195-5p	69	92	9.44761	(10.37, 8.12)	8.63585	3.09314	x
hsa-miR-200a-3p	69	92	13.3994	(14.02, 12.6)	12.3118	3.96643	x
hsa-miR-26b-5p	69	92	10.916	(11.44, 9.35)	9.56537	3.95347	x
hsa-miR-27a-5p	69	92	6.03521	(6.99, 5.15)	5.7085	2.38466	x
hsa-miR-30a-3p	69	92	9.90163	(10.25, 9.2)	8.89811	3.00197	x
hsa-miR-331-3p	69	92	10.0629	(10.88, 9.59)	9.27836	3.40733	x
hsa-miR-335-5p	69	92	10.1212	(10.87, 9.14)	9.24561	3.22184	x
hsa-miR-375	69	92	9.60483	(10.48, 8.4)	8.27569	4.00451	x
hsa-miR-885-5p	69	92	10.9256	(12.15, 9.02)	9.68168	3.97161	x
hsa-miR-99a-5p	69	92	9.58941	(10.03, 8.63)	8.763	2.93314	x
hsa-miR-100-5p	68	90.6667	9.20609	(9.86, 8.4)	8.29934	3.26029	x
hsa-miR-1291	68	90.6667	8.69355	(10.1, 7.86)	8.09954	3.38192	x
hsa-miR-141-3p	68	90.6667	12.6032	(13.23, 11.81)	11.3513	4.29965	x
hsa-miR-150-5p	68	90.6667	8.31298	(9.65, 6.26)	7.5674	3.83039	x
hsa-miR-17-5p	68	90.6667	11.968	(12.56, 10.92)	10.7024	3.96092	x
hsa-miR-186-5p	68	90.6667	7.18812	(8.06, 6.24)	6.5361	3.14462	x
hsa-miR-193a-5p	68	90.6667	9.49015	(10.07, 8.51)	8.49362	3.16773	x
hsa-miR-205-5p	68	90.6667	9.3621	(10.39, 8.04)	8.49405	3.45435	x
hsa-miR-206	68	90.6667	4.56205	(6.46, 3.28)	4.59804	3.01835	x
hsa-miR-20a-5p	68	90.6667	12.5458	(13.49, 11.44)	11.3033	4.14372	x
hsa-miR-218-5p	68	90.6667	7.28792	(7.77, 6.07)	6.4293	2.72882	x
hsa-miR-224-5	68	90.6667	9.34841	(10.28, 8.11)	8.34323	3.41309	x
hsa-miR-25-3p	68	90.6667	7.74185	(8.2, 6.8)	6.87463	2.77793	x
hsa-miR-28-5p	68	90.6667	9.11013	(9.5, 8.08)	8.04031	3.14781	x
hsa-miR-30e-3p	68	90.6667	10.0287	(10.51, 9.08)	8.84537	3.48456	x
hsa-miR-532-5p	68	90.6667	5.75302	(6.65, 5.27)	5.37653	2.43306	x
hsa-miR-532-3p	68	90.6667	4.5506	(5.53, 3.39)	4.13409	2.02175	x
hsa-miR-622	68	90.6667	7.72806	(9.52, 6.23)	7.23246	3.24982	x
hsa-let-7c-5p	67	89.3333	7.24862	(8, 5.99)	6.28403	2.97879	x
hsa-let-7d-5p	67	89.3333	6.41321	(6.9, 5.67)	5.61833	2.5608	x
hsa-miR-1244	67	89.3333	2.89361	(3.88, 1.37)	2.59833	1.98373	x
hsa-miR-125b-5p	67	89.3333	10.2229	(10.86, 9.05)	8.87179	3.82844	x
hsa-miR-193a-3p	67	89.3333	2.56426	(3.6, 1.49)	2.29245	1.93766	x
hsa-miR-212-3p	67	89.3333	8.71396	(9.39, 7.77)	7.41364	4.15079	x
hsa-miR-324-3p	67	89.3333	8.75058	(9.27, 8.2)	7.66253	3.58106	x
hsa-miR-324-5p	67	89.3333	7.20911	(7.7, 6.28)	6.3691	2.80823	x
hsa-miR-365a-3p	67	89.3333	5.84147	(7.08, 4.26)	5.10223	2.9356	x
hsa-miR-548d-5	67	89.3333	4.34906	(5.02, 3.64)	3.92523	2.56794	x
hsa-miR-574-3p	67	89.3333	9.77234	(10.5, 8.78)	8.58355	4.0846	x
hsa-miR-629-3p	67	89.3333	2.70638	(3.33, 1.82)	2.3638	1.88445	x
hsa-miR-661	67	89.3333	13.0181	(14.11, 12.27)	11.6563	4.9817	x
hsa-miR-140-5p	67	89.3333	5.12323	(6.05, 4)	4.60051	2.50438	x
hsa-miR-374b-5p	67	89.3333	8.57279	(9.53, 7.31)	7.4982	3.41767	x
hsa-miR-27a-3p	66	88	7.8125	(8.61, 7)	6.88503	3.37436	x
hsa-miR-30c-5p	66	88	14.1714	(15.32, 12.6)	12.1435	5.96485	x
hsa-miR-452-5p	66	88	6.97767	(7.72, 5.98)	5.92411	3.38163	x
hsa-miR-942-5p	66	88	5.51909	(6.23, 4.78)	4.82926	2.67956	x
hsa-miR-148b-3p	65	86.6667	4.93227	(5.46, 3.71)	4.0401	2.48429	x
hsa-miR-16-5p	65	86.6667	10.6814	(11.84, 9.12)	9.11611	4.76646	x
hsa-miR-181c-5p	65	86.6667	5.04519	(5.65, 3.89)	4.00174	2.82562	x
hsa-miR-190a-5p	65	86.6667	5.54276	(6.49, 4.38)	4.64442	3.01632	x
hsa-miR-200c-3p	65	86.6667	13.6365	(14.44, 12.53)	11.5201	5.77566	x
hsa-miR-222-3p	65	86.6667	9.13797	(10.26, 7.83)	7.75519	4.48118	x
hsa-miR-320b	65	86.6667	8.34948	(9.08, 6.56)	6.9178	3.91344	x
hsa-miR-362-3p	65	86.6667	2.01202	(3.19, 1.04)	1.81663	1.89864	x
hsa-miR-548am-5p	65	86.6667	3.61807	(4.69, 2.15)	3.03136	2.85305	x
hsa-miR-660-5p	65	86.6667	8.66395	(9.06, 7.85)	7.33462	3.75233	x
hsa-miR-101-3p	64	85.3333	5.35912	(5.94, 4.14)	4.29583	2.89789	x
hsa-miR-135a-5p	64	85.3333	6.13969	(7.23, 4.66)	5.06573	3.28904	x
hsa-miR-142-3p	64	85.3333	5.48834	(7.78, 3.73)	5.18413	3.97897	x
hsa-miR-29b-3p	64	85.3333	6.66733	(7.22, 5.69)	5.49874	3.27342	x
hsa-miR-340-5p	64	85.3333	4.13169	(5, 2.2)	3.26097	2.80971	x
hsa-miR-361-5p	64	85.3333	6.07921	(6.76, 5.51)	4.96701	3.27981	x
hsa-miR-483-5	64	85.3333	8.69821	(9.72, 7.7)	7.59241	5.07335	x
hsa-miR-886-3p(15)	64	85.3333	5.447	(6.55, 3.79)	4.61703	3.38759	x
hsa-let-7g-5p	63	84	8.25647	(9.08, 6.93)	6.70766	4.15433	x
hsa-miR-125a-5p	63	84	4.34226	(5.39, 2.5)	3.41276	3.19309	x
hsa-miR-15a-5p	63	84	5.36159	(6.09, 4.47)	4.34725	3.0384	x
hsa-miR-15b-5p	63	84	6.62646	(7.38, 5.87)	5.41849	3.61805	x
hsa-miR-21-5p	63	84	11.8383	(12.88, 10.54)	9.70765	5.62328	x
hsa-miR-210-3p	63	84	10.8563	(11.37, 10.36)	8.99853	4.97813	x
hsa-miR-29c-5p	63	84	3.32225	(3.89, 2.29)	2.52565	2.48345	x
hsa-miR-140-3p	62	82.6667	2.25597	(3.18, 1.25)	1.7269	2.61895	x
hsa-miR-143-3p	62	82.6667	6.04354	(7.21, 4.66)	4.90938	3.63197	x
hsa-miR-146b-3p	62	82.6667	6.68274	(7.28, 5.75)	5.19646	3.94138	x
hsa-miR-184	62	82.6667	2.12087	(3.54, -0.16)	1.6165	2.83505	x
hsa-miR-22-3p	62	82.6667	12.0712	(12.84, 11.26)	9.89914	5.86021	x
hsa-miR-27b-3p	62	82.6667	6.63176	(7.5, 5.53)	5.18529	3.92535	x
hsa-miR-548b-5	62	82.6667	4.18458	(5.34, 3.02)	3.44564	3.33402	x
hsa-miR-590-3p	62	82.6667	2.79555	(3.59, 1.49)	2.09861	2.33701	x
hsa-miR-598-3p	62	82.6667	3.43609	(4.08, 2.02)	2.4546	2.69535	x
hsa-miR-645	62	82.6667	3.9463	(5.01, 2.67)	2.9748	3.88913	x
hsa-miR-744-5p	62	82.6667	6.52934	(7.08, 5.89)	5.19752	3.74628	x
hsa-miR-1300(13)	61	81.3333	6.18033	(6.79, 4.36)	4.4902	3.83059	x
hsa-miR-190b	61	81.3333	2.76925	(3.59, 1.26)	1.90177	2.61375	x
hsa-miR-194-5p	61	81.3333	5.11866	(5.88, 4.4)	3.86074	3.37795	x
hsa-miR-196b-5p	61	81.3333	1.40614	(2.52, -0.41)	0.924411	2.25344	x
hsa-miR-29a-5p	61	81.3333	4.46954	(4.95, 3.53)	3.2248	3.11886	x
hsa-miR-30d-3p	61	81.3333	4.70231	(5.28, 3.55)	3.36296	3.23004	x
hsa-miR-502-3p	61	81.3333	1.87905	(2.89, 0.82)	1.31264	2.46458	x
hsa-miR-590-5p	61	81.3333	8.48893	(8.97, 7.27)	6.42568	4.90436	x
hsa-miR-1290	60	80	5.48476	(7.15, 3.76)	3.99474	4.67139	x
hsa-miR-141-5p	60	80	1.69626	(2.71, 0.2)	1.05449	2.49632	x
hsa-miR-155-5p	60	80	2.22538	(4.26, 1.2)	2.05225	3.53979	x
hsa-miR-20a-3p	60	80	2.66435	(3.41, 0.72)	1.69306	2.53484	x
hsa-miR-31-3p	60	80	3.71213	(4.98, 1.83)	2.92498	3.12941	x
hsa-miR-34a-5p	60	80	9.01683	(9.81, 7.77)	6.89885	5.0309	x
hsa-miR-422a	60	80	2.80752	(3.3, 1.33)	1.78645	2.89126	x
hsa-miR-628-5p	60	80	1.3962	(2.17, -0.05)	0.748042	2.4924	x
hsa-miR-642a-5p	60	80	1.24687	(2.51, -0.51)	0.774997	2.35074	x
hsa-miR-10a-5p	59	78.6667	3.99921	(5.12, 1.77)	2.78203	3.5343
hsa-miR-886-5p(15)	59	78.6667	3.85998	(5.3, 1.42)	2.80093	3.82952
hsa-miR-185-5p	58	77.3333	5.19915	(5.95, 4.27)	3.60906	3.81967
hsa-miR-200a-5p	58	77.3333	4.62091	(5.17, 3.06)	3.08243	3.49406
hsa-miR-200b-3p	58	77.3333	10.7708	(11.59, 8.92)	7.82658	6.28267
hsa-miR-340-3p	58	77.3333	1.04329	(2.02, -0.45)	0.617462	2.33159
hsa-miR-455-5p	58	77.3333	4.12279	(5.26, 2.16)	2.93098	3.4805
hsa-miR-9-3p	58	77.3333	0.279412	(1.33, -1.1)	-0.118669	2.24694
hsa-miR-93-3p	58	77.3333	1.0774	(1.99, -0.27)	0.352636	2.63665
hsa-miR-148b-5p	57	76	-0.108215	(0.87, -1.4)	-0.449019	2.05562
hsa-miR-18a-5p	57	76	5.16049	(5.89, 1.51)	3.3516	3.69874
hsa-miR-192-5p	57	76	7.37837	(8.1, 6.06)	5.14525	5.10289
hsa-miR-181a-3p	57	76	4.84366	(5.55, 2.96)	3.15839	3.68312
hsa-miR-22-5p	57	76	4.63957	(5.57, 2.73)	3.16961	3.65068
hsa-miR-29c-3p	57	76	11.2829	(12.25, 2.42)	7.69214	7.01331
hsa-miR-338-5p	57	76	1.7108	(3.13, -1.02)	0.966685	3.83735
hsa-miR-577	57	76	0.107782	(1.2, -1.22)	-0.395107	2.12318
hsa-miR-597-5p	57	76	3.32581	(4.4, 1.46)	2.05294	4.10708
hsa-miR-181a-2-3p	56	74.6667	3.59336	(4.14, 0.5)	2.09553	3.26119
hsa-miR-28-3p	56	74.6667	5.35467	(5.94, 1.87)	3.38315	4.16002
hsa-miR-31-5	56	74.6667	6.99245	(8.33, 1.97)	4.79169	5.18836
hsa-miR-342-3p	56	74.6667	7.09236	(7.91, 0.19)	4.45995	5.49794
hsa-miR-579-3p	56	74.6667	0.975539	(2.01, -0.38)	0.340949	2.49271
hsa-miR-601	56	74.6667	5.00085	(6.74, 0)	3.14873	4.72463
hsa-miR-26b-3p	55	73.3333	-1.80737	(-0.41, -3.51)	-1.92569	2.06817
hsa-miR-95-3p	55	73.3333	1.80157	(3.34, -0.59)	0.898943	3.10446
hsa-miR-20b-5p	54	72	4.87808	(5.96, -0.41)	2.9514	4.11209
hsa-miR-301a-3p	54	72	3.01211	(3.76, -0.41)	1.4086	3.42826
hsa-miR-497-5p	54	72	3.54756	(4.15, -0.41)	1.77105	3.93192
hsa-miR-516a-3p	54	72	-1.11619	(0.75, -2.85)	-1.25741	2.85982
hsa-miR-103a-3p	53	70.6667	8.19904	(8.86, -0.74)	4.82139	5.78157
hsa-miR-223-5p	53	70.6667	1.60797	(2.79, -0.74)	0.929827	3.46909
hsa-miR-301b	53	70.6667	1.75813	(2.8, -0.51)	0.692629	3.01147
hsa-miR-572	53	70.6667	6.43366	(7.55, -0.51)	4.04015	5.46369
hsa-miR-1276	52	69.3333	5.40073	(6.44, -0.74)	3.03483	4.87158
hsa-miR-182-5p	52	69.3333	0.578426	(1.56, -1.21)	-0.323806	2.77788
hsa-miR-204-5p	52	69.3333	3.57839	(5.26, -0.74)	2.06649	4.36192
hsa-miR-93-5p	52	69.3333	7.68358	(8.28, -0.74)	4.46486	5.55045
hsa-miR-381-3p	51	68	0.892831	(2.7, -3.43)	0.132884	4.0303
hsa-miR-99a-3p	51	68	2.51507	(3.31, -1.57)	0.852114	3.59205
hsa-miR-135b-5p	50	66.6667	1.30755	(3.06, -1.6)	0.356846	3.65235
hsa-miR-362-5p	50	66.6667	2.67831	(3.98, -1.57)	1.10306	3.86469
hsa-miR-502-5p	50	66.6667	3.44987	(4.48, -3.32)	1.26946	4.3694
hsa-miR-576-3p	49	65.3333	1.02472	(2.53, -2.16)	0.225075	3.41341
hsa-miR-625-5	48	64	-2.81397	(-1.1, -4)	-2.73008	1.87488
hsa-miR-151a-5p	47	62.6667	2.15216	(3.23, -3.65)	0.20797	3.8706
hsa-miR-197-3p	47	62.6667	6.98786	(8.32, -4.01)	3.44706	6.18911
hsa-miR-339-3p	47	62.6667	5.075	(5.8, -4.08)	2.01653	5.16417
hsa-miR-627-5p	47	62.6667	-1.01198	(-0.05, -3.64)	-1.79499	2.50266
hsa-miR-629-5	47	62.6667	0.0372105	(0.93, -3.59)	-1.039	2.95048
hsa-miR-202-3p	46	61.3333	2.09451	(3.86, -4.39)	0.26632	4.15078
hsa-miR-330-3p	46	61.3333	3.53956	(4.82, -4.01)	1.13343	4.60645
hsa-miR-515-3p	46	61.3333	-0.823256	(0.81, -4.52)	-1.63344	2.98454
hsa-miR-96-5p	46	61.3333	-0.393784	(1.23, -3.87)	-1.04779	3.01296
hsa-miR-32-5p	45	60	0.567038	(2.1, -3.94)	-0.447383	3.37648
hsa-miR-517c-3p	45	60	2.73185	(4.99, -4.62)	0.849186	4.82468
hsa-miR-720(18)	45	60	14.0519	(16.22, -5.35)	7.32981	10.2185
hsa-miR-133a-3p	44	58.6667	4.04515	(5.35, -4.39)	1.12705	5.04946
hsa-miR-145-5p	43	57.3333	3.42023	(5.3, -5.09)	1.10684	5.41689
hsa-miR-512-3p	43	57.3333	6.90895	(7.75, -4.22)	2.54944	6.26619
hsa-miR-616-5p	43	57.3333	-0.429328	(1.21, -3.94)	-1.38302	2.92947
hsa-miR-99b-3p	43	57.3333	4.01228	(5.64, -5.45)	1.01852	5.96752
hsa-miR-7-1-3p	43	57.3333	7.61147	(8.53, -3.94)	3.1282	6.27744
hsa-miR-520f-3p	42	56	0.396492	(2.32, -5.4)	-0.774469	4.08914
hsa-miR-550a-5p	42	56	-0.925902	(0.85, -5.26)	-1.46971	3.7507
hsa-miR-1255b-5p	41	54.6667	1.22933	(3.35, -5.26)	-0.290639	4.52638
hsa-miR-564	40	53.3333	6.25755	(8.21, -4.95)	2.28539	6.55844
hsa-miR-604	40	53.3333	-0.35547	(1.66, -5.26)	-1.12611	3.67668
hsa-miR-648	40	53.3333	6.12969	(8.19, -4.59)	2.31824	6.59796
hsa-miR-23a-5p	39	52	-0.35547	(1.94, -5.01)	-1.01442	3.79811
hsa-miR-339-5p	39	52	7.02529	(8.45, -4.52)	2.31875	6.56504
hsa-miR-126-3p	38	50.6667	-2.18619	(-0.17, -5.02)	-2.28486	2.94895
hsa-miR-1303	38	50.6667	3.35635	(6.73, -5.46)	1.24974	6.23459
hsa-miR-18a-3p	38	50.6667	-1.54801	(-0.44, -5.18)	-2.50817	2.53878
hsa-miR-193b-5p	38	50.6667	3.93338	(5.58, -4.85)	0.637284	5.25052
hsa-miR-151a-3p	37	49.3333	-0.35547	(6.11, -5.43)	0.57651	5.71686
hsa-miR-26a-1-3p	37	49.3333	-2.4662	(-1.24, -4.85)	-2.85501	2.28252
hsa-miR-127-3p	36	48	-0.399174	(3.26, -5.63)	-0.940899	4.36754
hsa-miR-135b-3p	36	48	-0.429328	(12.78, -5.2)	3.61818	8.91347
hsa-miR-16-1-3p	36	48	-0.399174	(1.94, -5.3)	-1.29327	3.70141
hsa-miR-296-5p	36	48	-0.399174	(5.39, -5.21)	0.221412	5.17221
hsa-miR-500a-5p	36	48	-0.399174	(3.54, -5.47)	-0.656903	4.38173
hsa-miR-1285-3p	35	46.6667	-0.429328	(4.31, -5.2)	-0.211919	4.99026
hsa-miR-219a-5p	35	46.6667	-0.429328	(2.08, -5.38)	-1.41569	3.8946
hsa-miR-411-5p	35	46.6667	-0.587344	(2.35, -5.21)	-1.34386	3.89853
hsa-miR-505-5p	35	46.6667	-0.587344	(2.47, -5.37)	-1.36204	3.90068
hsa-miR-635	35	46.6667	-0.587344	(1.58, -5.46)	-1.64371	3.93302
hsa-miR-451a	35	46.6667	-0.898401	(1.25, -5.54)	-1.69245	3.68646
hsa-miR-491-5p	35	46.6667	-0.429328	(5.03, -5.21)	0.0646849	5.09298
hsa-miR-34a-3p	34	45.3333	-0.587344	(7.49, -5.37)	0.866734	6.32908
hsa-miR-378a-5p	34	45.3333	-1.01198	(2.67, -5.47)	-1.06216	4.78943
hsa-miR-378a-3p(19)	34	45.3333	-0.587344	(4.92, -5.59)	-0.252176	5.2738
hsa-miR-519d-3p	34	45.3333	-2.13167	(0.24, -5.68)	-2.4915	3.15704
hsa-miR-545-3p	34	45.3333	-1.41779	(0.44, -5.45)	-2.24805	3.39618
hsa-miR-548a-3p	34	45.3333	-1.0875	(0.46, -5.9)	-2.50811	3.57466
hsa-miR-628-3p	34	45.3333	-1.01198	(2.48, -5.47)	-1.45659	4.0554
hsa-miR-638	33	44	-2.18619	(9.43, -5.59)	1.5008	7.63979
hsa-miR-518a-3p	32	42.6667	-2.36133	(-0.68, -5.8)	-3.09387	2.75845
hsa-miR-625-3p	32	42.6667	-2.18619	(4.25, -5.71)	-0.740922	5.27344
hsa-miR-769-5p	32	42.6667	-1.01198	(3.44, -5.71)	-1.15935	4.65816
hsa-miR-7-5p	31	41.3333	-2.13167	(0.54, -5.47)	-2.35944	3.21121
hsa-miR-10b-3p	31	41.3333	-3.93964	(1.06, -5.96)	-2.29841	3.9788
hsa-miR-376c-3p	31	41.3333	-2.13167	(4.1, -5.54)	-1.07215	4.68052
hsa-miR-425-3p	31	41.3333	-2.13167	(1.64, -5.45)	-1.69951	3.85083
hsa-miR-423-5p	30	40	-3.8906	(7.37, -5.8)	0.0276984	6.48533
hsa-miR-630	30	40	-2.50998	(-0.36, -5.63)	-2.97496	2.73116
hsa-let-7f-5p	29	38.6667	-3.28282	(6.58, -5.54)	-0.097973	5.97582
hsa-miR-125a-3p	29	38.6667	-3.85025	(1.13, -5.63)	-2.2574	3.69232
hsa-miR-138-5p	29	38.6667	-3.85025	(1.56, -5.54)	-2.00759	4.01382
hsa-miR-221-3p	29	38.6667	-3.28282	(6.7, -5.54)	-0.0977429	6.01602
hsa-miR-744-3p	29	38.6667	-3.85025	(1.27, -5.55)	-2.18306	3.93921
hsa-miR-33a-3p	28	37.3333	-3.36116	(0.78, -5.76)	-2.5379	3.5722
hsa-miR-142-5p	27	36	-3.85025	(-0.51, -5.54)	-2.84712	3.1345
hsa-miR-222-5p	27	36	-3.85025	(3.94, -5.59)	-1.25298	4.85462
hsa-miR-548c-3p	27	36	-4.13906	(-0.3, -6.17)	-3.25507	3.47679
hsa-miR-663b	27	36	-3.85025	(10.05, -5.57)	0.87353	7.70202
hsa-miR-9-5p	27	36	-3.85025	(3.32, -5.49)	-1.56451	4.47841
hsa-miR-1226-5p	26	34.6667	-3.8906	(5.67, -5.47)	-0.872221	5.45485
hsa-miR-337-5p	26	34.6667	-3.93964	(5.38, -6.04)	-1.17406	5.75277
hsa-miR-1179	25	33.3333	-4.88089	(-3.28, -6.09)	-4.49668	1.86255
hsa-miR-136-3p	25	33.3333	-3.94567	(-0.8, -5.71)	-3.32042	2.86935
hsa-miR-183-3p	25	33.3333	-3.94567	(6.71, -5.8)	-0.85261	6.04617
hsa-miR-215-5p	25	33.3333	-3.95028	(6.23, -5.76)	-1.03996	5.78147
hsa-miR-520h	25	33.3333	-4.07817	(7.76, -5.71)	-0.399532	6.8767
hsa-miR-372-3p	24	32	-4.07817	(2.8, -5.71)	-1.4888	5.42434
hsa-miR-147a	23	30.6667	-4.07817	(2.66, -5.76)	-2.28248	4.32422
hsa-miR-499a-5p	23	30.6667	-4.09016	(0.26, -6.04)	-2.75713	3.98905
hsa-miR-1201(15)	21	28	-4.09016	(0.69, -5.9)	-2.73592	3.8079
hsa-miR-302b-3p	21	28	-4.68919	(-0.55, -6.11)	-3.40807	3.22745
hsa-miR-302c-3p	21	28	-4.35809	(0.54, -5.84)	-2.95723	3.4796
hsa-miR-410-3p	21	28	-4.68919	(2.41, -5.86)	-2.5265	4.20781
hsa-miR-518d-3p	21	28	-4.82366	(3.3, -6.03)	-1.63608	6.29836
hsa-miR-639	21	28	-4.35809	(4.29, -5.84)	-1.89747	5.08427
hsa-let-7g-3p	20	26.6667	-4.82366	(-0.44, -6.11)	-3.45473	3.12252
hsa-miR-10a-3p	20	26.6667	-4.68919	(-0.74, -6.01)	-3.48592	3.0463
hsa-miR-1289	20	26.6667	-5.01694	(-0.41, -6.12)	-3.49625	3.27778
hsa-miR-520c-3p	20	26.6667	-5.20354	(2.34, -6.12)	-2.70956	4.44742
hsa-miR-545-5p	20	26.6667	-4.35809	(-2.7, -5.84)	-4.28242	2.03019
hsa-miR-708-5p	20	26.6667	-5.2016	(1.83, -6.09)	-2.60545	4.46614
hsa-miR-1271-5p	19	25.3333	-4.88089	(-1.93, -6.04)	-4.1981	2.30448
hsa-miR-128-3p	19	25.3333	-4.68919	(-0.08, -6.03)	-3.00061	3.71848
hsa-miR-27b-5p	19	25.3333	-5.01694	(0.46, -6.07)	-3.02526	3.76197
hsa-miR-520b	19	25.3333	-4.82366	(0.34, -6.07)	-2.76339	4.10099
hsa-miR-616-3p	19	25.3333	-4.68919	(1.37, -6.1)	-2.30858	4.87842
hsa-miR-124-3p	19	25.3333	-5.15535	(1.4, -6.19)	-1.76133	6.10551
hsa-let-7e-5p	18	24	-5.01694	(-0.38, -6.08)	-1.42186	6.64369
hsa-miR-1227-3p	18	24	-5.01694	(-0.38, -6.11)	-2.48806	5.03675
hsa-miR-211-5p	18	24	-5.2016	(-0.38, -6.19)	-2.66243	4.78052
hsa-miR-302d-3p	18	24	-4.82366	(-0.38, -6.09)	-3.34559	3.34929
hsa-miR-326	18	24	-5.2016	(-0.38, -6.19)	-2.89692	4.34124
hsa-miR-489-3p	18	24	-5.01694	(-0.39, -6.09)	-2.87033	4.27696
hsa-miR-454-3p	17	22.6667	-5.2016	(-0.41, -6.07)	-2.54676	4.91296
hsa-miR-517a-3p	17	22.6667	-5.15535	(-0.41, -6.19)	-2.5667	4.93168
hsa-miR-518e-3p	17	22.6667	-5.29237	(-0.41, -6.17)	-3.6592	3.28371
hsa-miR-15a-3p	16	21.3333	-5.01694	(-0.56, -6.1)	-3.65254	3.02877
hsa-miR-373-3p	16	21.3333	-5.29237	(-0.51, -6.33)	-2.99777	4.61394
hsa-miR-591	16	21.3333	-5.2016	(-0.74, -6.35)	-3.7905	3.34685
hsa-miR-595	16	21.3333	-5.2016	(-0.51, -6.23)	-2.34954	5.65317
hsa-miR-652-3p	16	21.3333	-5.31617	(-0.51, -6.24)	-2.48725	5.53568
hsa-miR-944	16	21.3333	-5.20354	(-3.37, -6.19)	-4.6279	2.02156
hsa-let-7i-3p	15	20	-5.20354	(-1.71, -6.24)	-4.14468	2.79041
hsa-miR-1183	15	20	-5.4021	(-0.74, -6.28)	-2.09403	6.60972
hsa-miR-192-3p	15	20	-5.2016	(-2.48, -6.17)	-4.40149	2.1997
hsa-miR-374a-3p	15	20	-5.2016	(-2.16, -6.1)	-4.24299	2.39205
hsa-miR-488-5p	15	20	-5.21945	(-0.96, -6.12)	-3.51525	3.58698
hsa-miR-671-3p	15	20	-5.21945	(-0.74, -6.1)	-3.46897	3.55771
hsa-miR-519a-3p	14	18.6667	-5.49764	(-0.96, -6.36)	-3.23934	4.86908
hsa-miR-548i	14	18.6667	-5.21945	(-2.51, -6.28)	-4.38576	2.4981
hsa-miR-875-5p	14	18.6667	-5.20354	(-0.96, -6.11)	-3.55138	3.67024
hsa-miR-1233-3p	13	17.3333	-5.4021	(-1.57, -6.28)	-2.19528	6.71501
hsa-miR-29b-2-5p	13	17.3333	-5.29237	(-1.57, -6.24)	-3.83505	3.50729
hsa-miR-338-3p	13	17.3333	-5.20354	(-3.32, -6.1)	-4.36152	2.36275
hsa-miR-380-5p	13	17.3333	-5.31617	(-2.16, -6.19)	-3.58866	3.90323
hsa-miR-449b-5p	13	17.3333	-5.29237	(-1.57, -6.12)	-3.91591	3.12339
hsa-miR-551b-5p	13	17.3333	-5.41771	(-2.73, -6.24)	-3.22557	5.00212
hsa-miR-1256	12	16	-5.44702	(-3.61, -6.33)	-4.68355	2.2543
hsa-miR-147b	12	16	-5.31617	(-2.16, -6.12)	-3.56676	3.90205
hsa-miR-323a-3p	12	16	-5.48452	(-3.92, -6.33)	-4.4556	3.11151
hsa-miR-519b-3p	12	16	-5.29237	(-2.36, -6.11)	-4.15225	2.74968
hsa-miR-520d-3p	12	16	-5.48452	(-2.16, -6.3)	-4.00108	3.49932
hsa-miR-617	12	16	-5.29237	(-2.16, -6.11)	-4.0032	3.0827
hsa-miR-888-5p	12	16	-5.48452	(-2.16, -6.28)	-3.65806	4.16113
hsa-miR-139-5p(18)	11	14.6667	-5.4021	(-2.73, -6.12)	-3.71123	3.63701
hsa-miR-145-3p	11	14.6667	-5.29237	(-3.32, -6.33)	-4.69122	2.14707
hsa-miR-183-5p	11	14.6667	-5.48452	(-3.61, -6.33)	-3.9027	3.77058
hsa-miR-19	11	14.6667	-5.31617	(-2.73, -6.23)	-3.84308	3.50131
hsa-miR-518f-3p	11	14.6667	-5.41771	(-2.73, -6.36)	-4.21602	3.17846
hsa-miR-522-3p	11	14.6667	-5.49764	(-3.32, -6.33)	-3.73235	4.09389
hsa-miR-614	11	14.6667	-5.48452	(-2.77, -6.35)	-3.84715	3.8463
hsa-miR-650	11	14.6667	-5.58738	(-3.32, -6.36)	-3.33472	5.15431
hsa-miR-92a-1-5p	11	14.6667	-5.44702	(-2.86, -6.28)	-4.29806	2.83239
hsa-miR-943	11	14.6667	-5.41771	(-3.32, -6.28)	-3.67868	4.14694
hsa-miR-137	11	14.6667	-5.4021	(-2.73, -6.23)	-4.22488	2.80514
hsa-miR-34b-3p	10	13.3333	-5.49764	(-3.61, -6.33)	-3.84246	4.19262
hsa-miR-646	10	13.3333	-5.49764	(-3.32, -6.36)	-2.17613	8.19825
hsa-miR-922	10	13.3333	-5.44702	(-3.32, -6.28)	-4.53717	2.34314
hsa-miR-186-3p	9	12	-5.48452	(-3.61, -6.33)	-4.6926	2.33362
hsa-miR-199a-3p	9	12	-5.44702	(-3.61, -6.28)	-3.9319	3.78226
hsa-miR-409-3p	9	12	-5.58738	(-3.94, -6.38)	-4.0687	3.85716
hsa-miR-424-5p	9	12	-5.41771	(-3.61, -6.24)	-4.33559	2.74385
hsa-miR-548k	9	12	-5.4021	(-3.87, -6.23)	-4.79977	2.00949
hsa-miR-548l	9	12	-5.44702	(-3.89, -6.33)	-4.71604	2.25249
hsa-miR-589-5p	9	12	-5.41771	(-3.92, -6.29)	-4.78895	2.11574
hsa-miR-934	9	12	-5.44702	(-4.06, -6.33)	-5.02028	1.82652
hsa-miR-1251-5p	8	10.6667	-5.48452	(-3.87, -6.33)	-4.70232	2.33658
hsa-miR-1269a	8	10.6667	-5.48452	(-3.92, -6.38)	-4.40171	3.15992
hsa-miR-18b-5p	8	10.6667	-5.41771	(-3.87, -6.23)	-3.99534	3.62452
hsa-miR-21-3p	8	10.6667	-5.41771	(-3.87, -6.24)	-3.97722	3.70059
hsa-miR-24-2-5p	8	10.6667	-5.48452	(-3.87, -6.24)	-4.14277	3.33756
hsa-miR-26a-2-3p	8	10.6667	-5.41771	(-3.92, -6.23)	-4.80255	1.95619
hsa-miR-302a-3p	8	10.6667	-5.44702	(-3.87, -6.28)	-4.41943	2.8228
hsa-miR-329-3p	8	10.6667	-5.41771	(-3.92, -6.28)	-4.6303	2.42359
hsa-miR-361-3p	8	10.6667	-5.44702	(-3.87, -6.28)	-4.28481	3.16461
hsa-miR-488-3p	8	10.6667	-5.44702	(-3.87, -6.23)	-4.56077	2.39865
hsa-miR-649	8	10.6667	-5.48452	(-3.94, -6.28)	-4.81831	2.18454
hsa-miR-892b	8	10.6667	-5.49764	(-3.92, -6.35)	-4.47377	2.97267
hsa-miR-1247-5p	7	9.33333	-5.48452	(-3.94, -6.33)	-4.06537	4.02254
hsa-miR-126-5p	7	9.33333	-5.44702	(-3.92, -6.28)	-4.36706	2.96076
hsa-miR-1262	7	9.33333	-5.44702	(-3.92, -6.24)	-4.77265	2.08666
hsa-miR-298	7	9.33333	-5.49764	(-3.92, -6.35)	-4.44128	3.38448
hsa-miR-376a-3p	7	9.33333	-5.59206	(-3.94, -6.38)	-4.3736	3.5765
hsa-miR-492	7	9.33333	-5.48452	(-3.92, -6.24)	-3.72769	4.68372
hsa-miR-520e	7	9.33333	-5.49764	(-3.94, -6.36)	-4.3534	3.50529
hsa-miR-548d-3	7	9.33333	-5.48452	(-3.92, -6.28)	-4.72364	2.29839
hsa-miR-554	7	9.33333	-5.48452	(-3.92, -6.28)	-4.63863	2.49546
hsa-miR-613	7	9.33333	-5.44702	(-3.92, -6.33)	-4.83182	2.06943
hsa-miR-125b-1-3p	6	8	-5.49764	(-3.94, -6.36)	-4.63056	2.69506
hsa-miR-1260a	6	8	-5.58738	(-4.01, -6.38)	-4.05919	4.71017
hsa-miR-132-3p	6	8	-5.59206	(-3.94, -6.37)	-4.00226	4.69471
hsa-miR-1324	6	8	-5.48452	(-3.94, -6.35)	-4.72342	2.46241
hsa-miR-155-3p	6	8	-5.49764	(-3.94, -6.28)	-4.81361	2.22207
hsa-miR-200c-5p	6	8	-5.59206	(-3.94, -6.35)	-4.6331	2.8001
hsa-miR-221-5p	6	8	-5.48452	(-3.94, -6.28)	-4.80779	2.19508
hsa-miR-487b-3p	6	8	-5.48452	(-3.94, -6.35)	-4.70386	2.50798
hsa-miR-494-3p	6	8	-5.65915	(-4.08, -6.38)	-4.54611	3.59184
hsa-miR-542-3p	6	8	-5.59206	(-3.95, -6.35)	-4.52871	3.2598
hsa-miR-924	6	8	-5.58738	(-3.95, -6.41)	-4.63893	3.10933
hsa-miR-187-3p	6	8	-5.59572	(-4.01, -6.38)	-4.32971	3.8382
hsa-miR-191-3p	5	6.66667	-5.49764	(-3.95, -6.28)	-4.78295	2.30584
hsa-miR-220a(15)	5	6.66667	-5.49764	(-3.95, -6.38)	-4.74427	2.67805
hsa-miR-425-5p	5	6.66667	-5.59206	(-4.01, -6.35)	-4.36519	3.70905
hsa-miR-449a	5	6.66667	-5.59206	(-3.95, -6.39)	-4.91809	2.26534
hsa-miR-454-5p	5	6.66667	-5.58738	(-4.22, -6.33)	-5.05879	1.82071
hsa-miR-493-3p	5	6.66667	-5.58738	(-4.01, -6.33)	-4.88785	2.22709
hsa-miR-503-5p	5	6.66667	-5.59206	(-4.08, -6.38)	-4.69544	3.22045
hsa-miR-505-3p	5	6.66667	-5.59206	(-3.95, -6.38)	-4.78501	2.55044
hsa-miR-519c-3p	5	6.66667	-5.59206	(-4.01, -6.41)	-4.8157	2.58142
hsa-miR-520d-5p	5	6.66667	-5.75952	(-4.76, -6.41)	-4.85373	3.1192
hsa-miR-539-5p	5	6.66667	-5.59206	(-4.08, -6.36)	-4.93862	2.30965
hsa-miR-548j-5p	5	6.66667	-5.49764	(-3.95, -6.33)	-4.9686	1.94414
hsa-miR-549a	5	6.66667	-5.49764	(-3.95, -6.36)	-4.98109	2.02086
hsa-miR-586	5	6.66667	-5.58738	(-3.95, -6.35)	-4.88759	2.19783
hsa-miR-603	5	6.66667	-5.59206	(-4.01, -6.41)	-4.99206	2.23666
hsa-miR-605-5p	5	6.66667	-5.59572	(-4.08, -6.38)	-4.66156	3.05192
hsa-miR-623	5	6.66667	-5.58738	(-4.01, -6.36)	-4.47091	3.61071
hsa-miR-624-5p	5	6.66667	-5.59206	(-4.08, -6.36)	-4.68189	3.17897
hsa-miR-63	5	6.66667	-5.59206	(-4.08, -6.38)	-4.32888	4.30111
hsa-miR-651-5	5	6.66667	-5.59206	(-3.95, -6.36)	-4.9247	2.11673
hsa-miR-889-3p	5	6.66667	-5.58738	(-3.95, -6.35)	-4.85004	2.36496
hsa-let-7a-5p	4	5.33333	-5.59206	(-4.01, -6.35)	-4.4813	3.58021
hsa-let-7b-5p	4	5.33333	-5.59572	(-4.01, -6.38)	-4.53002	3.87302
hsa-miR-144-5p	4	5.33333	-5.59206	(-4.01, -6.35)	-4.98013	1.95547
hsa-miR-149-5p	4	5.33333	-5.59206	(-4.01, -6.35)	-4.60412	3.29725
hsa-miR-181c-3p	4	5.33333	-5.58738	(-4.01, -6.35)	-4.65045	2.83709
hsa-miR-218-2-3p	4	5.33333	-5.58738	(-4.01, -6.36)	-4.95233	2.18452
hsa-miR-331-5p	4	5.33333	-5.59206	(-4.08, -6.36)	-4.90601	2.5013
hsa-miR-34b-5p	4	5.33333	-5.59206	(-4.08, -6.36)	-4.82959	2.67973
hsa-miR-363-3p	4	5.33333	-5.59572	(-4.01, -6.38)	-4.73665	2.84532
hsa-miR-369-3p	4	5.33333	-5.58738	(-4.01, -6.36)	-4.91726	2.31992
hsa-miR-450b-5p	4	5.33333	-5.59206	(-4.04, -6.35)	-5.11354	1.85815
hsa-miR-452-3p	4	5.33333	-5.59572	(-4.22, -6.38)	-5.10333	1.94894
hsa-miR-518b	4	5.33333	-5.59572	(-4.08, -6.36)	-4.96523	2.29201
hsa-miR-606	4	5.33333	-5.59206	(-4.01, -6.35)	-5.06469	1.91959
hsa-miR-643	4	5.33333	-5.59572	(-4.52, -6.38)	-4.51606	4.72195
hsa-miR-659-3p	4	5.33333	-5.59206	(-4.01, -6.36)	-4.4549	3.86635
hsa-miR-802	4	5.33333	-5.59206	(-4.22, -6.38)	-5.11334	1.98061
hsa-miR-921	4	5.33333	-5.65915	(-4.08, -6.41)	-5.00237	2.32902
hsa-miR-938	4	5.33333	-5.59206	(-4.22, -6.36)	-5.11101	1.9219
hsa-miR-379-5p	4	5.33333	-5.59206	(-4.01, -6.35)	-4.79305	2.58767
hsa-let-7e-3p	3	4	-5.59206	(-4.08, -6.41)	-5.19699	1.88335
hsa-miR-100-3p	3	4	-5.59206	(-4.21, -6.36)	-5.14914	1.85064
hsa-miR-1180-3p	3	4	-5.59206	(-4.08, -6.36)	-4.9314	2.26955
hsa-miR-1184	3	4	-5.59206	(-4.08, -6.35)	-5.00175	2.10916
hsa-miR-1275	3	4	-5.59572	(-4.52, -6.41)	-4.74127	3.86233
hsa-miR-1305	3	4	-5.75952	(-4.52, -6.41)	-5.02521	2.69767
hsa-miR-132-5p	3	4	-5.59572	(-4.08, -6.36)	-5.03278	2.12649
hsa-miR-17-3p	3	4	-5.65915	(-4.22, -6.41)	-5.06958	2.20953
hsa-miR-19b-1-5p	3	4	-5.65915	(-4.22, -6.38)	-5.03068	2.23549
hsa-miR-302b-5p	3	4	-5.65915	(-4.22, -6.41)	-5.05325	2.25768
hsa-miR-335-3p	3	4	-5.59572	(-4.08, -6.36)	-4.8272	2.80781
hsa-miR-369-5p	3	4	-5.59206	(-4.08, -6.38)	-5.18358	1.89386
hsa-miR-383-5p	3	4	-5.59206	(-4.08, -6.35)	-4.81781	2.62418
hsa-miR-432-5p	3	4	-5.59572	(-4.08, -6.38)	-5.02325	2.23876
hsa-miR-432-3p	3	4	-5.59206	(-4.08, -6.38)	-4.96949	2.33373
hsa-miR-486-3p	3	4	-5.65915	(-4.22, -6.38)	-4.78037	3.19837
hsa-miR-517b(17)	3	4	-5.59572	(-4.22, -6.38)	-5.03864	2.29172
hsa-miR-523-3p	3	4	-5.59572	(-4.22, -6.36)	-4.80789	3.58967
hsa-miR-525-5p	3	4	-5.65915	(-4.22, -6.38)	-5.03375	2.29111
hsa-miR-542-5p	3	4	-5.59572	(-4.08, -6.36)	-4.96795	2.28739
hsa-miR-563	3	4	-5.59572	(-4.08, -6.38)	-5.06109	2.14504
hsa-miR-634	3	4	-5.59572	(-4.22, -6.36)	-5.21153	1.85487
hsa-miR-672(10)	3	4	-5.65915	(-4.22, -6.41)	-5.02787	2.33791
hsa-miR-7-2-3p	3	4	-5.59206	(-4.08, -6.36)	-4.99659	2.19783
hsa-miR-758-3p	3	4	-5.65915	(-4.52, -6.41)	-5.12344	2.28828
hsa-miR-766-3p	3	4	-5.59572	(-4.08, -6.36)	-4.79235	2.9137
hsa-miR-767-3p	3	4	-5.59572	(-4.08, -6.36)	-5.06733	2.12267
hsa-miR-873-5p	3	4	-5.59206	(-4.08, -6.38)	-5.01756	2.21924
hsa-miR-10b-5p	2	2.66667	-5.65915	(-4.22, -6.4)	-5.19827	1.93518
hsa-miR-1243	2	2.66667	-5.59572	(-4.48, -6.36)	-5.19573	1.83429
hsa-miR-1248	2	2.66667	-5.59572	(-4.22, -6.36)	-5.20465	1.86196
hsa-miR-1254	2	2.66667	-5.75952	(-4.52, -6.41)	-5.18133	2.07498
hsa-miR-1265	2	2.66667	-5.75952	(-4.52, -6.41)	-5.09318	2.43519
hsa-miR-18b-3p	2	2.66667	-5.59572	(-4.22, -6.38)	-5.06992	2.22328
hsa-miR-202-5p	2	2.66667	-5.65915	(-4.22, -6.38)	-5.02217	2.78954
hsa-miR-208a-3p	2	2.66667	-5.59572	(-4.22, -6.38)	-5.10769	2.18686
hsa-miR-296-3p	2	2.66667	-5.65915	(-4.22, -6.38)	-5.09541	2.12887
hsa-miR-34c-5p	2	2.66667	-5.65915	(-4.22, -6.38)	-5.11217	2.11825
hsa-miR-374b-3p	2	2.66667	-5.59572	(-4.46, -6.36)	-5.2163	1.81629
hsa-miR-411-3p	2	2.66667	-5.65915	(-4.52, -6.38)	-5.09763	2.24704
hsa-miR-516b-5p	2	2.66667	-5.75952	(-4.22, -6.41)	-5.10579	2.25554
hsa-miR-518f-5p	2	2.66667	-5.65915	(-4.22, -6.41)	-4.99326	2.67711
hsa-miR-519e-3p	2	2.66667	-5.75952	(-4.52, -6.41)	-5.12445	2.19209
hsa-miR-525-3p	2	2.66667	-5.65915	(-4.22, -6.38)	-5.18519	1.96951
hsa-miR-551b-3p	2	2.66667	-5.59572	(-4.22, -6.36)	-5.11735	1.98019
hsa-miR-555	2	2.66667	-5.65915	(-4.52, -6.41)	-5.21921	1.95393
hsa-miR-556-5p	2	2.66667	-5.65915	(-4.52, -6.38)	-5.20625	1.96978
hsa-miR-561-3	2	2.66667	-5.59572	(-4.22, -6.38)	-5.20511	1.89282
hsa-miR-562	2	2.66667	-5.65915	(-4.52, -6.38)	-5.11775	2.15715
hsa-miR-570-3	2	2.66667	-5.59572	(-4.22, -6.36)	-5.17976	1.9029
hsa-miR-576-5	2	2.66667	-5.65915	(-4.22, -6.38)	-5.00794	2.57673
hsa-miR-581	2	2.66667	-5.59572	(-4.22, -6.36)	-5.06757	2.10644
hsa-miR-582-3p	2	2.66667	-5.59572	(-4.22, -6.36)	-5.13986	1.93091
hsa-miR-588	2	2.66667	-5.59572	(-4.22, -6.38)	-5.12174	2.07141
hsa-miR-589-3p	2	2.66667	-5.59572	(-4.22, -6.38)	-5.05352	2.20307
hsa-miR-615-5p	2	2.66667	-5.59572	(-4.22, -6.41)	-4.9921	2.67699
hsa-miR-654-3p	2	2.66667	-5.65915	(-4.22, -6.41)	-5.20052	1.9309
hsa-miR-657	2	2.66667	-5.59572	(-4.22, -6.38)	-4.75838	3.6212
hsa-miR-662	2	2.66667	-5.65915	(-4.22, -6.41)	-4.97157	2.71386
hsa-miR-664a-3p	2	2.66667	-5.65915	(-4.22, -6.38)	-5.01474	2.38067
hsa-miR-936	2	2.66667	-5.75952	(-4.52, -6.41)	-5.07388	2.43666
hsa-miR-101-5p	1	1.33333	-5.75952	(-4.52, -6.41)	-5.23157	1.96413
hsa-miR-105-5p	1	1.33333	-5.65915	(-4.52, -6.38)	-5.22208	1.92513
hsa-miR-122-5p	1	1.33333	-5.75952	(-4.59, -6.41)	-5.22627	2.00109
hsa-miR-1224-3p	1	1.33333	-5.65915	(-4.52, -6.41)	-5.24391	1.90329
hsa-miR-1225-3p	1	1.33333	-5.65915	(-4.52, -6.38)	-5.02996	2.70448
hsa-miR-1236-3p	1	1.33333	-5.65915	(-4.52, -6.38)	-5.15495	2.0711
hsa-miR-124-5p	1	1.33333	-5.65915	(-4.52, -6.38)	-5.26674	1.85269
hsa-miR-1249	1	1.33333	-5.75952	(-4.76, -6.41)	-5.14972	2.35622
hsa-miR-1267	1	1.33333	-5.75952	(-4.52, -6.41)	-5.22451	1.97761
hsa-miR-1282	1	1.33333	-5.65915	(-4.52, -6.38)	-5.22865	1.91541
hsa-miR-1283	1	1.33333	-5.75952	(-4.52, -6.41)	-5.09658	2.5659
hsa-miR-1292-5p	1	1.33333	-5.65915	(-4.52, -6.41)	-5.25999	1.87597
hsa-miR-1302	1	1.33333	-5.65915	(-4.52, -6.38)	-5.24868	1.87292
hsa-miR-130b-5p	1	1.33333	-5.65915	(-4.52, -6.38)	-5.20429	1.90464
hsa-miR-133b	1	1.33333	-5.65915	(-4.52, -6.38)	-5.18249	2.04911
hsa-miR-136-5p	1	1.33333	-5.65915	(-4.52, -6.41)	-5.15194	2.23511
hsa-miR-154-3p	1	1.33333	-5.65915	(-4.61, -6.38)	-5.27514	1.84781
hsa-miR-15b-3p	1	1.33333	-5.65915	(-4.52, -6.41)	-5.18292	2.08965
hsa-miR-196a-3p	1	1.33333	-5.65915	(-4.52, -6.41)	-5.23104	1.92626
hsa-miR-199a-5p	1	1.33333	-5.65915	(-4.52, -6.41)	-5.18072	2.09801
hsa-miR-199b-5p	1	1.33333	-5.65915	(-4.52, -6.38)	-5.1717	2.00395
hsa-miR-19a-5p	1	1.33333	-5.65915	(-4.52, -6.41)	-5.26001	1.87593
hsa-miR-20b-3p	1	1.33333	-5.65915	(-4.52, -6.38)	-5.24024	1.82397
hsa-miR-214-5p	1	1.33333	-5.75952	(-4.52, -6.41)	-5.24905	1.90633
hsa-miR-218-1-3p	1	1.33333	-5.65915	(-4.52, -6.41)	-5.23893	1.91374
hsa-miR-219a-1-3p	1	1.33333	-5.75952	(-4.52, -6.41)	-5.23206	1.97038
hsa-miR-220c(15)	1	1.33333	-5.75952	(-4.52, -6.41)	-5.07879	2.70032
hsa-miR-23a-3p	1	1.33333	-5.65915	(-4.52, -6.38)	-5.12212	2.21627
hsa-miR-325	1	1.33333	-5.65915	(-4.52, -6.41)	-5.17016	2.13298
hsa-miR-33b-5p	1	1.33333	-5.65915	(-4.52, -6.38)	-5.18873	2.00972
hsa-miR-342-5p	1	1.33333	-5.65915	(-4.52, -6.41)	-5.24956	1.89257
hsa-miR-367-3p	1	1.33333	-5.65915	(-4.52, -6.38)	-5.21032	1.86801
hsa-miR-370-3p	1	1.33333	-5.65915	(-4.52, -6.41)	-5.26215	1.87305
hsa-miR-377-5p	1	1.33333	-5.65915	(-4.52, -6.41)	-5.20336	2.01374
hsa-miR-384	1	1.33333	-5.65915	(-4.52, -6.41)	-5.23087	1.92217
hsa-miR-433-3p	1	1.33333	-5.65915	(-4.76, -6.38)	-5.28339	1.8458
hsa-miR-455-3p	1	1.33333	-5.75952	(-4.52, -6.41)	-5.21949	1.99795
hsa-miR-486-5p	1	1.33333	-5.75952	(-4.52, -6.41)	-5.07123	2.74829
hsa-miR-490-3p	1	1.33333	-5.65915	(-4.52, -6.41)	-5.167	2.13992
hsa-miR-491-3p	1	1.33333	-5.75952	(-4.52, -6.41)	-5.12646	2.41686
hsa-miR-507	1	1.33333	-5.75952	(-4.59, -6.41)	-5.23828	1.96414
hsa-miR-513b-5p	1	1.33333	-5.65915	(-4.52, -6.41)	-5.27795	1.85735
hsa-miR-513c-5p	1	1.33333	-5.65915	(-4.52, -6.38)	-5.23459	1.89719
hsa-miR-515-5p	1	1.33333	-5.75952	(-4.52, -6.41)	-5.23663	1.94014
hsa-miR-517-5p	1	1.33333	-5.65915	(-4.52, -6.38)	-5.21047	1.95608
hsa-miR-518c-3p	1	1.33333	-5.65915	(-4.52, -6.38)	-5.20168	1.91125
hsa-miR-518d-5p	1	1.33333	-5.75952	(-4.76, -6.41)	-5.23112	2.01714
hsa-miR-518e-5p	1	1.33333	-5.75952	(-4.52, -6.41)	-5.09361	2.60847
hsa-miR-519e-5p	1	1.33333	-5.75952	(-4.52, -6.41)	-5.23063	1.96402
hsa-miR-524-5p	1	1.33333	-5.75952	(-4.52, -6.41)	-5.23661	1.94754
hsa-miR-526b-5p	1	1.33333	-5.65915	(-4.52, -6.41)	-5.1929	2.05104
hsa-miR-548g-3p	1	1.33333	-5.65915	(-4.52, -6.41)	-5.26656	1.86768
hsa-miR-548h-5p	1	1.33333	-5.75952	(-4.52, -6.41)	-5.21478	2.01683
hsa-miR-548p	1	1.33333	-5.65915	(-4.52, -6.41)	-5.25316	1.88488
hsa-miR-550a-3p	1	1.33333	-5.75952	(-4.52, -6.41)	-5.2516	1.91959
hsa-miR-551a	1	1.33333	-5.65915	(-4.52, -6.41)	-5.22456	1.9626
hsa-miR-557	1	1.33333	-5.65915	(-4.52, -6.41)	-5.24979	1.89216
hsa-miR-575	1	1.33333	-5.65915	(-4.52, -6.41)	-5.1527	2.23143
hsa-miR-578	1	1.33333	-5.7292	(-4.76, -6.38)	-5.28855	1.84414
hsa-miR-583	1	1.33333	-5.75952	(-4.52, -6.41)	-5.2345	1.9532
hsa-miR-592	1	1.33333	-5.65915	(-4.52, -6.38)	-5.23447	1.90035
hsa-miR-609	1	1.33333	-5.65915	(-4.52, -6.41)	-5.26882	1.86521
hsa-miR-618	1	1.33333	-5.65915	(-4.52, -6.38)	-5.19201	1.93784
hsa-miR-624-3p	1	1.33333	-5.65915	(-4.52, -6.38)	-5.24351	1.89309
hsa-miR-633	1	1.33333	-5.65915	(-4.52, -6.41)	-5.23836	1.91497
hsa-miR-653-5p	1	1.33333	-5.75952	(-4.52, -6.41)	-5.23226	1.96217
hsa-miR-654-5p	1	1.33333	-5.75952	(-4.52, -6.41)	-5.14159	2.33496
hsa-miR-665	1	1.33333	-5.75952	(-4.52, -6.41)	-5.11072	2.50648
hsa-miR-668-3p	1	1.33333	-5.65915	(-4.52, -6.41)	-5.22277	1.9538
hsa-miR-767-5p	1	1.33333	-5.65915	(-4.76, -6.41)	-5.29607	1.85167
hsa-miR-874-3p	1	1.33333	-5.65915	(-4.52, -6.41)	-5.13643	2.30409
hsa-miR-891a-5	1	1.33333	-5.65915	(-4.52, -6.38)	-5.15543	2.16125
hsa-miR-941	1	1.33333	-5.65915	(-4.52, -6.38)	-5.13323	2.1631
hsa-miR-98-5p	1	1.33333	-5.75952	(-4.59, -6.41)	-5.18098	2.17989
hsa-let-7d-3p	1	1.33333	-5.75952	(-4.76, -6.38)	-5.29479	1.84758
hsa-miR-129-2-3p	1	1.33333	-5.75952	(-4.52, -6.41)	-5.16108	2.23633
hsa-miR-134-5p	1	1.33333	-5.65915	(-4.52, -6.38)	-5.2198	1.93113
hsa-miR-153-3p	1	1.33333	-5.65915	(-4.52, -6.4)	-5.24937	1.88383
hsa-miR-495-3p	1	1.33333	-5.65915	(-4.52, -6.38)	-5.18688	2.03258
hsa-miR-496	1	1.33333	-5.75952	(-4.52, -6.41)	-5.18665	2.12045
a. Missing Cq values assumed to be assumed to be due to non-detectable EV-microRNA levels and replaced with 35 before global mean normalization.

## Sheet: S2_Asthma_microRNA_exp
Spreadsheet S2: Associations between maternal asthma and expression levels of EV-microRNAs. Associations between -ΔCq values of 130 EV-microRNAs detected ≥ 80% of samples analyzed using robust linear regression. Adjusted models included the covariates of infant sex, maternal race, education, and postpartum week of breast milk collection.
	Active during pregnancy								Inactive during pregnancy
	Unadjuted				Adjusted				Unadjuted				Adjusted
microRNA	B	95% CI, lower	95% CI, upper	p	B	95% CI, lower	95% CI, upper	p	B	95% CI, lower	95% CI, upper	p	B	95% CI, lower	95% CI, upper	p
hsa-let-7c-5p	-0.546066	-1.35581	0.263675	0.186254	-0.176879	-1.39782	1.04406	0.776455	0.668553	-1.21667	2.55377	0.487018	0.440372	-0.578425	1.45917	0.39689
hsa-let-7d-5p	-0.325406	-0.855616	0.204805	0.22902	-0.191891	-0.833232	0.449451	0.55759	-0.0302936	-1.02158	0.960997	0.952238	-0.417117	-1.57734	0.743105	0.481037
hsa-let-7g-5p	-0.4708	-1.22771	0.286113	0.222807	-0.269027	-1.13052	0.592461	0.540497	0.179461	-1.53989	1.89881	0.837904	-0.0361399	-2.02783	1.95555	0.97163
hsa-miR-100-5p	-0.440483	-0.988299	0.107333	0.115037	-0.297471	-0.984024	0.389082	0.395761	0.710629	0.0307388	1.39052	0.0405035	0.50391	0.0155247	0.992295	0.0431488
hsa-miR-101-3p	-0.457226	-1.55969	0.645241	0.416301	-0.43957	-1.69141	0.812272	0.491315	0.342972	-1.05516	1.74111	0.630664	-0.0126396	-1.05684	1.03156	0.981072
hsa-miR-106a-5p	-0.372921	-0.977357	0.231515	0.226568	-0.267202	-0.893724	0.35932	0.403214	0.0295723	-1.28241	1.34156	0.964763	-0.312388	-1.72389	1.09912	0.664455
hsa-miR-106b-5p	-0.82212	-1.43054	-0.2137	0.00808797	-0.683395	-1.33102	-0.0357659	0.0386208	0.524581	-0.370896	1.42006	0.250898	0.487821	-0.390374	1.36602	0.276276
hsa-miR-1244	-0.0807877	-1.30174	1.14017	0.896815	0.0383627	-1.07198	1.14871	0.946011	0.389282	-0.37325	1.15181	0.317027	0.397628	-0.476973	1.27223	0.372888
hsa-miR-125a-5p	-0.4133	-1.49869	0.672089	0.455471	-0.315122	-1.51436	0.884114	0.606541	-0.633977	-3.18568	1.91772	0.626288	-1.0464	-3.62054	1.52774	0.425606
hsa-miR-125b-5p	-0.377286	-1.14566	0.391086	0.335858	-0.143805	-1.05643	0.768824	0.757446	0.913309	-0.0892311	1.91585	0.0741774	0.61607	-0.219334	1.45147	0.148351
hsa-miR-1290	2.08755	0.690482	3.48462	0.00340441	2.13501	0.187868	4.08214	0.0316289	0.667109	-2.27787	3.61209	0.657057	0.727701	-2.92977	4.38517	0.696566
hsa-miR-1291	0.233934	-0.808268	1.27614	0.659983	0.278214	-0.809624	1.36605	0.616189	1.04521	-0.179477	2.26989	0.0943801	0.267662	-1.61902	2.15435	0.780968
hsa-miR-1300(13)	0.0301845	-0.946118	1.00649	0.95168	0.11397	-0.927731	1.15567	0.830208	1.103	0.496298	1.7097	0.000366258	0.4709	-0.373154	1.31496	0.274188
hsa-miR-130a-3p	0.203804	-0.544995	0.952602	0.593721	0.306857	-0.454289	1.068	0.429433	2.43331	1.54881	3.31782	6.96891e-08	2.02296	1.02089	3.02502	7.59725e-05
hsa-miR-130b-3p	-0.459227	-1.12509	0.206632	0.176458	-0.367194	-1.10207	0.367685	0.327418	1.27406	0.25587	2.29226	0.0141867	1.16814	0.0139414	2.32233	0.0472962
hsa-miR-135a-5p	-0.948237	-2.21468	0.318204	0.142238	-0.660679	-1.8972	0.575847	0.295001	0.916451	-0.558872	2.39177	0.223413	0.589289	-0.4103	1.58888	0.247902
hsa-miR-140-3p	-0.481578	-1.48159	0.518436	0.34524	-0.5319	-1.64411	0.580313	0.348592	-0.784262	-3.80665	2.23813	0.611047	-0.871021	-3.00068	1.25864	0.422775
hsa-miR-140-5p	-0.161864	-1.34127	1.01754	0.787937	0.0476785	-1.15852	1.25388	0.938247	-0.0971514	-1.06512	0.87082	0.844052	-0.345062	-1.21498	0.52486	0.436901
hsa-miR-141-3p	-0.633729	-1.23896	-0.028497	0.0401456	-0.44826	-1.15748	0.260957	0.215422	-0.00763686	-1.24825	1.23298	0.990374	-0.17055	-0.888109	0.547009	0.641326
hsa-miR-141-5p	-0.276423	-1.18579	0.632946	0.551326	-0.315107	-1.27699	0.646777	0.520827	-0.282724	-2.3914	1.82595	0.792717	-0.462733	-2.33826	1.41279	0.628694
hsa-miR-142-3p	0.3722	-1.65429	2.39869	0.718861	0.536252	-1.64497	2.71748	0.629909	0.384056	-1.45834	2.22645	0.68286	-0.229077	-2.0826	1.62444	0.808601
hsa-miR-143-3p	-0.562998	-1.8001	0.674101	0.372409	-0.328982	-1.61473	0.95677	0.616026	1.41609	0.0201422	2.81204	0.0467847	0.950786	-0.130667	2.03224	0.0848614
hsa-miR-146a-5p	-0.397552	-1.52967	0.734564	0.491291	-0.426758	-1.50173	0.64821	0.436511	1.86977	0.883043	2.8565	0.000204029	1.04206	0.311881	1.77223	0.00515596
hsa-miR-146b-3p	-0.113539	-0.785195	0.558117	0.740403	0.0294195	-0.695227	0.754066	0.936578	0.797883	-0.451433	2.0472	0.210664	0.372135	-1.15519	1.89946	0.632971
hsa-miR-146b-5p	-0.733461	-1.45806	-0.00886018	0.0472637	-0.596456	-1.33473	0.141818	0.113315	0.0765594	-0.962635	1.11575	0.885189	0.0521575	-0.757052	0.861367	0.899471
hsa-miR-148a-3p	-0.539044	-1.41129	0.333206	0.225802	-0.462511	-1.30231	0.377283	0.280393	1.81984	0.962569	2.67712	3.17334e-05	1.73494	0.713814	2.75607	0.00086826
hsa-miR-148b-3p	-0.800114	-1.51641	-0.0838182	0.0285742	-0.760732	-1.52022	-0.00124025	0.0496271	0.959912	0.192443	1.72738	0.0142291	0.881365	0.127092	1.63564	0.0220092
hsa-miR-150-5p	0.982794	-0.355141	2.32073	0.149949	1.04561	-0.293918	2.38514	0.126039	-0.0577187	-2.83968	2.72425	0.967564	-0.281584	-2.86058	2.29741	0.83055
hsa-miR-152-3p	-0.585541	-1.30225	0.131167	0.109318	-0.480947	-1.18034	0.218447	0.177725	0.840478	0.225386	1.45557	0.00740305	0.975905	0.261674	1.69014	0.00740547
hsa-miR-155-5p	0.630886	-1.03476	2.29653	0.457866	0.602975	-1.01549	2.22144	0.465266	-0.56847	-3.08515	1.94821	0.657969	-0.794191	-3.32671	1.73833	0.538793
hsa-miR-15a-5p	-0.357019	-1.17596	0.461927	0.392859	-0.36397	-1.25189	0.523953	0.421737	0.128324	-0.390209	0.646858	0.627645	-0.134012	-0.914354	0.646331	0.736423
hsa-miR-15b-5p	-0.526244	-1.43663	0.384139	0.257235	-0.599952	-1.6565	0.456598	0.265731	-0.38277	-1.76947	1.00393	0.588501	-1.02459	-2.75669	0.707506	0.2463
hsa-miR-16-5p	-0.557696	-1.59141	0.476015	0.290321	-0.413921	-1.53286	0.705014	0.468429	0.776822	-1.11259	2.66623	0.420341	0.387097	-1.58672	2.36091	0.700697
hsa-miR-17-5p	-0.374365	-1.03189	0.283165	0.264462	-0.234246	-0.958788	0.490296	0.526302	-0.000938415	-1.45502	1.45314	0.998991	-0.29294	-1.6783	1.09242	0.678551
hsa-miR-181a-5p	-0.557743	-1.04035	-0.0751346	0.0235065	-0.456729	-0.989133	0.0756749	0.0926894	0.387831	-0.0492734	0.824935	0.0820306	0.349732	-0.113707	0.813172	0.13912
hsa-miR-181c-5p	-0.0292705	-0.836559	0.778018	0.943347	0.108465	-0.936789	1.15372	0.838835	0.50891	-0.985576	2.0034	0.504506	-0.364265	-1.86281	1.13428	0.633771
hsa-miR-184	0.171365	-1.00411	1.34684	0.775085	0.320433	-0.90683	1.5477	0.608835	2.11391	0.876342	3.35147	0.000814414	1.68014	0.464194	2.89608	0.00676509
hsa-miR-186-5p	-0.474668	-1.19179	0.242452	0.194522	-0.305892	-1.10721	0.495426	0.454346	-0.126138	-1.2277	0.97542	0.82242	0.0590606	-0.940965	1.05909	0.907848
hsa-miR-190a-5p	-0.676109	-1.62228	0.270058	0.16135	-0.570717	-1.75736	0.615927	0.345862	0.165572	-0.819203	1.15035	0.741754	0.0822923	-0.542858	0.707442	0.796405
hsa-miR-190b	-0.812927	-2.04542	0.419562	0.196096	-0.76686	-1.95605	0.422331	0.206266	1.49347	0.431216	2.55573	0.00585849	1.15682	0.052343	2.26131	0.0400872
hsa-miR-191-5p	-0.693462	-1.17457	-0.212357	0.00472688	-0.649009	-1.17037	-0.127648	0.014694	-0.205066	-0.595791	0.185658	0.303639	-0.201408	-0.584876	0.182059	0.303277
hsa-miR-193a-3p	-0.919056	-2.25416	0.416046	0.177273	-0.92494	-1.9782	0.128322	0.0852188	-0.262778	-0.998646	0.473091	0.483989	-0.450483	-1.09013	0.189167	0.167484
hsa-miR-193a-5p	-0.510472	-1.12999	0.109049	0.106318	-0.383872	-0.956738	0.188993	0.189063	1.46308	0.963789	1.96238	9.28532e-09	1.21994	0.604757	1.83513	0.000101614
hsa-miR-193b-3p	-0.406367	-1.29639	0.483652	0.370848	-0.29385	-1.32373	0.73603	0.576008	0.283784	-0.415464	0.983032	0.42636	0.582834	-0.198762	1.36443	0.143867
hsa-miR-194-5p	-0.567577	-1.35851	0.223361	0.159584	-0.475519	-1.4456	0.49456	0.33668	-0.404426	-1.71429	0.905434	0.54508	-1.01092	-2.50939	0.487555	0.186084
hsa-miR-195-5p	-0.542941	-1.52934	0.443455	0.280668	-0.199392	-1.22458	0.825797	0.703056	1.0556	-0.530814	2.64201	0.19218	0.30872	-1.04004	1.65748	0.653706
hsa-miR-196b-5p	-0.585196	-1.52945	0.359057	0.224489	-0.331779	-1.47674	0.813184	0.570073	-0.994801	-5.32293	3.33332	0.652358	-0.89718	-3.46463	1.67027	0.493408
hsa-miR-19a-3p	-0.533753	-1.20864	0.141138	0.121122	-0.371768	-1.14698	0.40344	0.347246	0.840279	0.124954	1.5556	0.0213164	0.685196	-0.051882	1.42227	0.0684543
hsa-miR-19b-3p	-0.730781	-1.33054	-0.131021	0.0169345	-0.562782	-1.18269	0.0571222	0.0751808	0.963076	0.371696	1.55446	0.00141367	0.841771	0.237085	1.44646	0.00636376
hsa-miR-200a-3p	-0.674034	-1.17054	-0.177527	0.00779661	-0.613042	-1.10674	-0.119349	0.0149421	0.327324	-0.354164	1.00881	0.346507	0.364874	-0.229386	0.959134	0.228816
hsa-miR-200c-3p	-0.163682	-1.00196	0.674597	0.701941	0.0886739	-0.894967	1.07231	0.859753	-0.282682	-2.21308	1.64772	0.774104	-0.46612	-2.18746	1.25522	0.595601
hsa-miR-203a	-0.206707	-0.718094	0.30468	0.428224	-0.225876	-0.845542	0.393789	0.474959	0.250046	-0.587008	1.0871	0.558222	0.0595196	-0.760312	0.879351	0.886849
hsa-miR-205-5p	0.0972633	-0.741305	0.935832	0.820166	0.284121	-0.712456	1.2807	0.576312	1.17225	0.294051	2.05046	0.0088908	0.666223	-0.227398	1.55985	0.143956
hsa-miR-206	-0.11281	-1.79115	1.56553	0.89519	-0.232906	-1.95333	1.48752	0.790752	0.476184	-2.44615	3.39852	0.749446	-0.380723	-2.97548	2.21404	0.773667
hsa-miR-20a-3p	-0.504852	-1.58358	0.573878	0.358999	-0.122777	-1.24129	0.995739	0.829657	0.321118	-1.7871	2.42934	0.765294	-0.0770476	-2.00846	1.85436	0.93768
hsa-miR-20a-5p	-0.547032	-1.48413	0.390064	0.252568	-0.333744	-1.30482	0.637327	0.500557	0.393951	-1.35128	2.13918	0.658184	-0.174652	-2.06009	1.71079	0.855932
hsa-miR-21-5p	0.132826	-1.2369	1.50255	0.849259	0.32862	-1.28666	1.9439	0.690082	1.0668	-0.0261612	2.15976	0.0557416	0.336349	-0.741337	1.41404	0.540729
hsa-miR-210-3p	-0.14016	-0.573419	0.293098	0.526046	-0.0853539	-0.688875	0.518167	0.781634	1.03426	-0.444913	2.51344	0.17055	1.05618	0.00283914	2.10952	0.0493857
hsa-miR-212-3p	-0.339194	-1.13775	0.459366	0.405122	-0.251329	-1.05775	0.555089	0.541303	0.0610905	-2.10774	2.22992	0.955973	-0.00408133	-1.3287	1.32053	0.995182
hsa-miR-218-5p	-0.449404	-1.25093	0.352123	0.271802	-0.455296	-1.19165	0.281055	0.225561	0.63332	0.0802544	1.18639	0.0248085	0.599389	0.10289	1.09589	0.0179751
hsa-miR-22-3p	-0.187507	-1.00056	0.625542	0.651261	-0.063291	-0.855619	0.729037	0.875591	1.20463	-0.38496	2.79421	0.137462	0.935425	-0.696585	2.56744	0.261268
hsa-miR-222-3p	-0.359167	-1.39171	0.673378	0.495387	-0.146967	-1.19555	0.901617	0.783543	0.024008	-2.34439	2.39241	0.984149	-0.293198	-2.19846	1.61206	0.762944
hsa-miR-223-3p	0.110464	-1.31013	1.53106	0.878868	0.211151	-1.03048	1.45279	0.7389	1.2047	0.382586	2.02682	0.00407797	0.613578	-0.398232	1.62539	0.234615
hsa-miR-224-5	-0.109092	-0.841229	0.623046	0.770254	-0.0514014	-0.959577	0.856774	0.911671	1.78332	0.909432	2.65721	6.34366e-05	1.65462	0.679926	2.62931	0.000877237
hsa-miR-24-3p	-0.470637	-0.968062	0.0267875	0.0636798	-0.414238	-0.85685	0.0283726	0.0666058	0.855526	0.406794	1.30426	0.000186409	0.723696	0.348234	1.09916	0.000158225
hsa-miR-25-3p	-0.634402	-1.24917	-0.0196347	0.0431183	-0.620403	-1.28978	0.0489757	0.0692843	1.53267	0.788701	2.27663	5.3958e-05	1.31626	0.555334	2.07719	0.000697991
hsa-miR-26a-5p	-0.454555	-1.22486	0.315752	0.24745	-0.25098	-1.10668	0.604725	0.565385	-0.0182925	-1.5376	1.50101	0.981173	-0.0399417	-0.80111	0.721227	0.918084
hsa-miR-26b-5p	-0.474621	-1.30227	0.353025	0.26103	-0.201394	-1.20696	0.804177	0.694661	0.402927	-0.824569	1.63042	0.51999	0.374824	-0.482518	1.23217	0.39151
hsa-miR-27a-3p	-0.0101928	-1.02692	1.00653	0.984323	0.0509446	-0.766333	0.868223	0.902762	0.696259	-0.0165494	1.40907	0.0555615	0.362532	-0.660518	1.38558	0.487343
hsa-miR-27a-5p	-0.537412	-1.43192	0.357096	0.238985	-0.55553	-1.41518	0.304123	0.205306	-0.565038	-1.40284	0.272768	0.186218	-1.00832	-1.97651	-0.0401219	0.0412325
hsa-miR-27b-3p	-0.219304	-1.05495	0.616346	0.606998	-0.0661268	-0.835811	0.703558	0.866278	1.25418	0.762112	1.74625	5.86725e-07	0.781124	-0.0455613	1.60781	0.0640339
hsa-miR-28-5p	-0.803727	-1.40247	-0.204984	0.00851406	-0.660603	-1.41019	0.0889878	0.0841162	0.0733914	-1.06375	1.21053	0.899339	0.275515	-0.558793	1.10982	0.517475
hsa-miR-29a-3p	-0.563312	-1.40762	0.280996	0.190987	-0.518292	-1.40175	0.365165	0.25021	-0.0734157	-0.718991	0.57216	0.823621	-0.243452	-0.899348	0.412444	0.466926
hsa-miR-29a-5p	-0.985124	-1.91406	-0.0561885	0.0376618	-1.05675	-1.99363	-0.119862	0.0270556	0.242314	-0.825178	1.30981	0.656392	-0.0173875	-1.60304	1.56826	0.982853
hsa-miR-29b-3p	-1.00429	-1.99578	-0.0128029	0.0471142	-1.04327	-2.20228	0.115748	0.0776938	-0.227677	-0.83111	0.375756	0.459603	-0.197227	-0.965709	0.571256	0.614955
hsa-miR-29c-5p	-0.629329	-1.33455	0.0758902	0.0802827	-0.559843	-1.33134	0.211657	0.154951	-0.801437	-2.34383	0.740957	0.308483	-0.991383	-2.68349	0.700728	0.250839
hsa-miR-30a-3p	-0.542777	-1.06238	-0.0231758	0.0406204	-0.546589	-1.03975	-0.0534314	0.0298317	0.605607	0.128446	1.08277	0.0128622	0.452089	0.0339321	0.870247	0.0340897
hsa-miR-30a-5p	-0.54028	-1.43084	0.350282	0.234417	-0.440558	-1.32788	0.446766	0.330491	0.586017	-0.098604	1.27064	0.0934103	0.621769	0.0877023	1.15584	0.0224999
hsa-miR-30b-5p	-0.790339	-1.71336	0.132684	0.0933042	-0.637	-1.5314	0.257401	0.162744	-0.283378	-1.94426	1.3775	0.738072	0.00281091	-1.16729	1.17291	0.996243
hsa-miR-30c-5p	0.0307389	-1.01155	1.07303	0.953906	0.74453	-0.92953	2.41859	0.38338	0.136376	-1.37083	1.64359	0.859239	0.216798	-0.87877	1.31237	0.698127
hsa-miR-30d-3p	-0.454052	-1.30953	0.401425	0.298215	-0.545264	-1.43829	0.347758	0.231416	0.0818323	-0.823223	0.986888	0.85934	0.003356	-1.10517	1.11188	0.995266
hsa-miR-30d-5p	-0.430989	-1.43575	0.573769	0.400503	-0.250978	-1.38358	0.88162	0.664058	0.0467966	-1.25836	1.35195	0.943975	0.215894	-0.839226	1.27102	0.688391
hsa-miR-30e-3p	-0.394151	-1.01014	0.221843	0.209803	-0.358968	-1.03972	0.321781	0.301363	0.403916	-0.650273	1.45811	0.452673	0.0792791	-1.13255	1.29111	0.897973
hsa-miR-31-3p	-0.00722311	-1.41358	1.39913	0.991968	-0.103622	-1.6589	1.45165	0.896104	-0.100154	-2.68981	2.4895	0.939578	-0.823806	-3.41811	1.7705	0.533696
hsa-miR-320a	-0.298063	-1.01941	0.423287	0.418021	0.0335766	-0.617417	0.68457	0.919479	0.00259184	-0.542909	0.548093	0.99257	0.274137	-0.396623	0.944896	0.423115
hsa-miR-320b	-0.777469	-1.75982	0.204887	0.120858	-0.662672	-1.82787	0.502526	0.264991	1.23713	0.517266	1.957	0.000756289	1.13673	0.0734985	2.19996	0.0361309
hsa-miR-324-3p	-0.740936	-1.29045	-0.191421	0.00822462	-0.510225	-1.06464	0.0441873	0.0712701	0.30871	-0.135687	0.753106	0.173346	0.0803819	-0.454601	0.615365	0.768385
hsa-miR-324-5p	-0.618941	-1.15955	-0.0783313	0.0248355	-0.607052	-1.14083	-0.0732723	0.0258133	0.774885	0.250228	1.29954	0.00379468	0.661212	0.133044	1.18938	0.0141405
hsa-miR-328-3p	-0.147381	-0.894232	0.599471	0.698925	-0.232607	-1.05838	0.593171	0.580889	1.02771	-0.244111	2.29952	0.113246	0.765417	-0.349276	1.88011	0.178357
hsa-miR-331-3p	-0.715076	-1.26499	-0.165161	0.0108151	-0.655345	-1.23868	-0.072015	0.0276702	0.430601	-0.272145	1.13335	0.229771	0.447396	-0.311968	1.20676	0.248191
hsa-miR-335-5p	-0.51885	-1.26123	0.223525	0.17074	-0.261327	-1.0791	0.556444	0.5311	1.42341	0.501643	2.34518	0.00247313	1.40609	0.381948	2.43022	0.00712546
hsa-miR-340-5p	-0.256947	-1.54303	1.02914	0.695367	-0.301408	-1.93892	1.3361	0.718279	0.188868	-1.41018	1.78791	0.816929	0.101164	-1.29576	1.49809	0.887128
hsa-miR-345-5p	-0.296409	-0.901977	0.309159	0.337383	-0.251775	-0.73602	0.23247	0.308179	0.787867	0.286379	1.28936	0.00207544	1.06176	0.448522	1.67499	0.000690079
hsa-miR-34a-5p	-0.756102	-2.30276	0.790555	0.337986	-0.991232	-3.12789	1.14542	0.363212	1.05297	0.418076	1.68787	0.00115165	0.363003	-0.753211	1.47922	0.523865
hsa-miR-361-5p	-0.431838	-0.978718	0.115042	0.121703	-0.440376	-1.16596	0.285206	0.23422	1.10641	0.544528	1.6683	0.000113674	0.952668	0.143711	1.76163	0.0209908
hsa-miR-362-3p	-0.50943	-1.50652	0.48766	0.316644	-0.453638	-1.55547	0.648198	0.419702	0.189704	-0.596616	0.976023	0.636319	0.13855	-0.706748	0.983848	0.74802
hsa-miR-365a-3p	-0.54404	-1.46795	0.379866	0.248451	-0.305495	-1.47338	0.862388	0.60817	1.06453	-0.329593	2.45866	0.134498	1.04451	-1.19748	3.28649	0.36118
hsa-miR-374a-5p	-0.386353	-1.16817	0.395461	0.332762	-0.13947	-1.03986	0.760923	0.761435	-0.2046	-1.64119	1.23199	0.780138	-0.198916	-1.25958	0.861749	0.713194
hsa-miR-374b-5p	-0.285629	-1.13251	0.561257	0.508588	-0.0378238	-0.912068	0.836421	0.932423	-0.106797	-2.23353	2.01994	0.921597	-0.274406	-2.17332	1.62451	0.777003
hsa-miR-375	-0.167733	-0.941238	0.605772	0.670826	-0.0394607	-0.995625	0.916704	0.935532	1.55271	0.900952	2.20447	3.02235e-06	1.72003	0.588084	2.85197	0.00289912
hsa-miR-422a	0.574974	-0.552784	1.70273	0.317667	0.589937	-0.499225	1.6791	0.288417	0.0178042	-1.75678	1.79239	0.984311	-0.436799	-2.23281	1.35921	0.633595
hsa-miR-429	-0.597104	-1.46391	0.269699	0.176972	-0.334952	-1.29102	0.621112	0.492295	0.385017	-1.48972	2.25976	0.687302	0.341066	-0.775183	1.45731	0.549266
hsa-miR-452-5p	-0.0196839	-0.60533	0.565962	0.947477	0.079758	-0.641759	0.801275	0.828475	1.19913	0.78339	1.61487	1.57496e-08	1.06606	0.454712	1.67741	0.000631401
hsa-miR-483-5	-0.737507	-1.80457	0.329556	0.175532	-0.837672	-2.18	0.504656	0.221291	-0.0159979	-3.20564	3.17364	0.992157	-1.09162	-5.60245	3.41921	0.635277
hsa-miR-484	-0.448967	-1.35525	0.45732	0.331573	-0.283768	-1.16075	0.593213	0.525956	0.590383	-0.187161	1.36793	0.136702	0.85796	-0.139739	1.85566	0.091902
hsa-miR-502-3p	0.391193	-0.510559	1.29294	0.39518	0.20274	-0.827657	1.23314	0.699762	0.821189	-1.07695	2.71933	0.396473	0.572949	-2.65027	3.79617	0.727542
hsa-miR-511-5p	-1.25362	-2.35386	-0.153386	0.0255353	-1.07715	-2.23302	0.0787252	0.067779	0.355404	-0.603416	1.31422	0.467535	0.66453	-0.451973	1.78103	0.243393
hsa-miR-532-3p	-0.230313	-0.999446	0.53882	0.55727	-0.088499	-0.959064	0.782066	0.842072	0.858879	-0.00581218	1.72357	0.0515599	0.474981	-0.464632	1.41459	0.321795
hsa-miR-532-5p	0.292828	-0.287894	0.873549	0.323002	0.353035	-0.240817	0.946887	0.243952	1.07809	0.493338	1.66284	0.000302057	0.816913	0.245892	1.38793	0.00504792
hsa-miR-548am-5p	0.55252	-0.719468	1.82451	0.394569	0.436693	-0.940574	1.81396	0.534303	0.920649	-1.12753	2.96882	0.378318	0.277217	-2.25966	2.81409	0.83041
hsa-miR-548b-5	0.708718	-0.577063	1.9945	0.279997	0.607698	-1.13042	2.34582	0.49318	1.46195	-0.542072	3.46597	0.152772	0.38262	-1.87018	2.63542	0.739221
hsa-miR-548d-5	0.0476447	-0.75733	0.85262	0.907648	-0.007828	-1.11447	1.09881	0.988938	0.388604	-0.939233	1.71644	0.566237	0.144331	-2.03901	2.32767	0.896911
hsa-miR-574-3p	-0.601139	-1.26067	0.0583889	0.0740271	-0.555514	-1.20768	0.096653	0.09502	-0.438098	-1.86004	0.983849	0.545937	-0.44817	-1.88298	0.986641	0.540403
hsa-miR-590-3p	-0.389144	-1.38449	0.606206	0.443514	-0.249692	-1.2932	0.793815	0.639081	0.196643	-1.6251	2.01839	0.832448	-0.0928506	-2.24413	2.05843	0.932585
hsa-miR-590-5p	-0.279472	-1.10933	0.55039	0.509218	-0.0473454	-1.2839	1.18921	0.94018	0.414572	-1.19358	2.02272	0.613372	0.0322393	-2.21472	2.2792	0.977565
hsa-miR-598-3p	-0.32937	-1.14693	0.488188	0.429755	-0.198443	-1.20118	0.804294	0.698105	0.582074	-1.09921	2.26336	0.49742	0.405744	-1.58531	2.3968	0.689593
hsa-miR-622	-0.72649	-2.3338	0.880817	0.375678	-0.401974	-1.85103	1.04708	0.586647	0.592882	-1.16162	2.34738	0.50777	0.0919162	-1.51789	1.70172	0.910895
hsa-miR-628-5p	-0.517064	-1.68702	0.652897	0.386377	-0.474856	-1.72614	0.776427	0.456999	-0.173202	-1.09412	0.747712	0.71241	-0.501929	-1.47557	0.471711	0.312305
hsa-miR-629-3p	-0.235154	-0.94955	0.479242	0.518829	-0.308217	-0.955084	0.33865	0.350367	0.31121	-0.247092	0.869512	0.274602	0.277605	-0.419271	0.974481	0.434941
hsa-miR-642a-5p	0.645252	-0.457341	1.74785	0.251383	0.561716	-0.633347	1.75678	0.356924	1.47773	0.50111	2.45435	0.0030206	1.58481	0.457131	2.71249	0.00587851
hsa-miR-645	0.735389	-0.494607	1.96538	0.241269	0.668045	-0.576992	1.91308	0.29296	2.22676	0.592744	3.86079	0.00756382	2.17822	0.659896	3.69654	0.00492642
hsa-miR-660-5p	-0.164831	-0.814151	0.484489	0.618808	-0.122899	-1.16014	0.914339	0.816359	0.927644	0.475035	1.38025	5.89332e-05	0.662297	0.24632	1.07827	0.00180511
hsa-miR-661	0.370372	-0.586147	1.32689	0.447904	0.347404	-0.588356	1.28316	0.466833	2.03489	0.596738	3.47305	0.0055505	1.49767	0.242525	2.75281	0.0193522
hsa-miR-744-5p	-0.311011	-0.853821	0.2318	0.261442	-0.24322	-0.82323	0.33679	0.411142	-0.614985	-5.54714	4.31717	0.806932	-0.332321	-5.50336	4.83872	0.899765
hsa-miR-885-5p	-0.0376038	-1.4876	1.4124	0.959462	0.544773	-0.851293	1.94084	0.44438	0.822929	-0.579801	2.22566	0.250211	1.62856	-0.30346	3.56059	0.098511
hsa-miR-886-3p(15)	0.540954	-0.843277	1.92518	0.443707	0.696089	-0.739498	2.13168	0.341935	1.83653	-0.659559	4.33263	0.149283	1.58547	-1.10685	4.27778	0.248421
hsa-miR-92a-3p	-0.519475	-1.19159	0.152638	0.12981	-0.354601	-1.26409	0.554887	0.444765	1.11528	0.175275	2.05528	0.0200493	1.19155	-0.475742	2.85883	0.161301
hsa-miR-942-5p	-0.122479	-0.894884	0.649926	0.755961	-0.169659	-0.972474	0.633157	0.678729	0.880332	0.120218	1.64045	0.0232108	0.509911	-0.331314	1.35114	0.234818
hsa-miR-99a-5p	-0.446431	-0.99758	0.104717	0.112383	-0.273235	-0.934399	0.387929	0.41795	0.540708	-0.1892	1.27062	0.146524	0.366948	-0.118888	0.852784	0.138782
hsa-miR-99b-5p	-0.376408	-0.81584	0.0630234	0.0931783	-0.297141	-0.811556	0.217274	0.257579	0.44671	-0.0442766	0.937697	0.074551	0.387598	-0.248698	1.0239	0.232515

## Sheet: S2_Atopy_microRNA_exp
Spreadsheet S2: Associations between maternal atopy and expression levels of EV-microRNAs. Associations between -ΔCq values of 130 EV-microRNAs detected ≥ 80% of samples analyzed using robust linear regression. Adjusted models included the covariates of infant sex, maternal race, education, and postpartum week of breast milk collection.
	Active during pregnancy								Inactive during pregnancy
	Unadjuted				Adjusted				Unadjuted				Adjusted
microRNA	B	95% CI, lower	95% CI, upper	p	B	95% CI, lower	95% CI, upper	p	B	95% CI, lower	95% CI, upper	p	B	95% CI, lower	95% CI, upper	p
hsa-let-7c-5p	-0.243815	-0.969984	0.482353	0.510493	-0.0837663	-0.842014	0.674481	0.828579	0.840725	-0.621596	2.30305	0.259813	0.550098	-0.432662	1.53286	0.272604
hsa-let-7d-5p	0.0303041	-0.538615	0.599223	0.916852	0.0901084	-0.45029	0.630507	0.743809	0.223107	-0.651939	1.09815	0.617269	-0.131416	-1.16224	0.899409	0.802689
hsa-let-7g-5p	-0.105614	-0.889663	0.678435	0.791769	-0.00209622	-0.821206	0.817014	0.995998	0.696353	-0.74272	2.13543	0.342922	0.373059	-1.27922	2.02533	0.658106
hsa-miR-100-5p	-0.289602	-0.861302	0.282098	0.320786	-0.271251	-0.966983	0.424481	0.444779	0.14529	-0.706521	0.9971	0.738151	-0.0480859	-0.824545	0.728373	0.90339
hsa-miR-101-3p	-0.0524954	-0.859433	0.754442	0.89854	-0.114448	-1.0356	0.806705	0.807607	0.329594	-0.872214	1.5314	0.59091	0.200034	-0.811363	1.21143	0.698282
hsa-miR-106a-5p	-0.0321075	-0.589009	0.524794	0.910031	0.0467206	-0.512999	0.60644	0.870045	0.416806	-0.448819	1.28243	0.345303	0.168823	-0.920645	1.25829	0.761345
hsa-miR-106b-5p	-0.347343	-1.01789	0.323205	0.309982	-0.378113	-1.01752	0.261294	0.246446	0.350727	-0.235617	0.937071	0.241049	0.20844	-0.45595	0.872831	0.538619
hsa-miR-1244	0.585182	-0.460511	1.63087	0.272721	0.601409	-0.57335	1.77617	0.315673	0.602295	-0.319007	1.5236	0.200084	0.304388	-0.749177	1.35795	0.571219
hsa-miR-125a-5p	-0.51578	-1.59099	0.559428	0.347115	-0.456879	-1.64413	0.730376	0.45071	0.396697	-1.39287	2.18626	0.663947	0.0577846	-1.94764	2.06321	0.954964
hsa-miR-125b-5p	-0.336516	-1.0622	0.389173	0.363417	-0.305372	-0.98328	0.372536	0.377296	0.625072	-0.316469	1.56661	0.193195	0.276982	-0.628676	1.18264	0.548889
hsa-miR-1290	1.86586	0.171057	3.56067	0.0309447	2.38353	0.149133	4.61793	0.0365478	0.0138115	-3.03189	3.05952	0.992909	0.5068	-3.22573	4.23933	0.790145
hsa-miR-1291	0.215934	-0.733962	1.16583	0.655925	0.202858	-0.728937	1.13465	0.669599	0.384951	-0.9638	1.7337	0.57589	0.053707	-1.45933	1.56675	0.944535
hsa-miR-1300(13)	-0.55267	-1.52945	0.42411	0.267446	-0.640867	-1.57871	0.29698	0.180467	0.662639	-0.0987674	1.42405	0.0880596	0.327423	-0.472394	1.12724	0.422347
hsa-miR-130a-3p	0.211209	-0.638853	1.06127	0.626273	0.456542	-0.300569	1.21365	0.237257	1.34454	-0.447014	3.13609	0.14131	0.975514	-0.917306	2.86833	0.312439
hsa-miR-130b-3p	-0.0408849	-0.736665	0.654895	0.90831	-0.0337883	-0.784252	0.716675	0.929683	0.270542	-0.506624	1.04771	0.495055	0.145111	-0.887397	1.17762	0.782964
hsa-miR-135a-5p	0.054831	-0.925787	1.03545	0.912734	0.161296	-0.820748	1.14334	0.747518	1.10412	-0.201177	2.40943	0.0973401	0.900639	-0.135701	1.93698	0.088508
hsa-miR-140-3p	-0.0447509	-0.930135	0.840633	0.921087	-0.11629	-1.01556	0.782985	0.799918	-0.97334	-2.27083	0.324147	0.141477	-1.00741	-2.59407	0.579246	0.21334
hsa-miR-140-5p	-0.221157	-1.16985	0.727537	0.647742	-0.147177	-1.13361	0.839257	0.769959	0.201297	-0.709165	1.11176	0.664772	0.128965	-0.735105	0.993035	0.769881
hsa-miR-141-3p	-0.247225	-0.861339	0.36689	0.430097	-0.178519	-0.812153	0.455116	0.580814	0.00824592	-0.91865	0.935142	0.986088	-0.179021	-0.924497	0.566456	0.637876
hsa-miR-141-5p	0.543768	-0.439245	1.52678	0.278284	0.447822	-0.478052	1.3737	0.343137	0.182929	-1.25616	1.62202	0.803252	0.000610556	-1.91533	1.91655	0.999502
hsa-miR-142-3p	-0.26419	-2.08917	1.56079	0.776617	-0.0633675	-1.81691	1.69018	0.943536	0.333478	-1.26057	1.92753	0.681785	0.282955	-1.47252	2.03843	0.752066
hsa-miR-143-3p	-0.586051	-1.74098	0.568882	0.319955	-0.276031	-1.30828	0.756214	0.600201	0.816206	-0.739175	2.37159	0.303707	0.760222	-0.517053	2.0375	0.243391
hsa-miR-146a-5p	-0.371268	-1.42999	0.687453	0.491886	-0.45752	-1.38933	0.474293	0.335878	0.591492	-0.880746	2.06373	0.431023	0.176282	-1.31711	1.66968	0.817037
hsa-miR-146b-3p	-0.0690088	-0.714718	0.5767	0.834084	-0.100117	-0.753823	0.55359	0.764045	0.827388	-0.257097	1.91187	0.134831	0.560616	-0.79853	1.91976	0.418838
hsa-miR-146b-5p	-0.210687	-0.840901	0.419527	0.512316	-0.151694	-0.783377	0.479988	0.637875	0.710629	-0.0737381	1.495	0.075781	0.651548	-0.0638284	1.36692	0.0742468
hsa-miR-148a-3p	-0.138946	-0.992388	0.714497	0.749655	-0.220024	-1.06166	0.621616	0.608386	0.989852	0.139602	1.8401	0.022503	0.884451	-0.144821	1.91372	0.0921446
hsa-miR-148b-3p	-0.349069	-0.978035	0.279896	0.276701	-0.417182	-1.06175	0.227387	0.204605	0.561354	-0.0300885	1.1528	0.0628495	0.518022	-0.223367	1.25941	0.170854
hsa-miR-150-5p	0.145145	-1.09203	1.38232	0.818135	0.203104	-1.05076	1.45697	0.75088	-0.882108	-3.3816	1.61739	0.489126	-0.773775	-3.1857	1.63814	0.529492
hsa-miR-152-3p	-0.0950573	-0.82759	0.637475	0.799237	-0.102172	-0.788836	0.584492	0.770568	0.58627	-0.0629187	1.23546	0.0767261	0.532201	-0.25803	1.32243	0.18684
hsa-miR-155-5p	0.0786677	-1.34383	1.50116	0.913685	0.173138	-1.26093	1.60721	0.812943	-1.14221	-3.42767	1.14325	0.327316	-0.952341	-3.40385	1.49917	0.446424
hsa-miR-15a-5p	-0.0628844	-0.723548	0.597779	0.852008	-0.0254688	-0.749451	0.698514	0.94503	0.0807807	-0.500987	0.662548	0.785508	-0.0404435	-0.79046	0.709573	0.91583
hsa-miR-15b-5p	-0.00741159	-0.703206	0.688383	0.983343	-0.0819825	-0.89188	0.727915	0.842733	-0.547161	-1.62191	0.52759	0.318363	-1.10481	-2.50578	0.296154	0.122191
hsa-miR-16-5p	-0.154889	-1.19735	0.887574	0.77089	0.00369791	-1.14554	1.15294	0.994968	0.529773	-1.26394	2.32348	0.562673	0.32337	-1.40056	2.0473	0.713139
hsa-miR-17-5p	-0.0923108	-0.719861	0.53524	0.773113	0.0683543	-0.503819	0.640527	0.814872	0.349246	-0.710146	1.40864	0.518193	0.168741	-0.841445	1.17893	0.743372
hsa-miR-181a-5p	-0.0739852	-0.537568	0.389598	0.754433	-0.0191953	-0.480603	0.442212	0.935014	0.396946	-0.0855433	0.879435	0.10686	0.373967	-0.122826	0.87076	0.140109
hsa-miR-181c-5p	0.17866	-0.625612	0.982932	0.663283	0.303004	-0.458515	1.06452	0.435474	0.610668	-0.654657	1.87599	0.344193	0.126109	-1.16407	1.41629	0.848074
hsa-miR-184	-0.811627	-2.01594	0.392685	0.186539	-0.536122	-1.6476	0.575352	0.344458	0.809463	-0.655223	2.27415	0.278728	0.538823	-0.556585	1.63423	0.335
hsa-miR-186-5p	-0.427612	-1.23807	0.38285	0.301086	-0.386102	-1.21929	0.447091	0.363747	-0.0354012	-1.15757	1.08677	0.950697	-0.0741882	-0.998642	0.850266	0.875017
hsa-miR-190a-5p	-0.442258	-1.29113	0.406609	0.307189	-0.443122	-1.41595	0.52971	0.371987	0.0131151	-0.983082	1.00931	0.979414	-0.324895	-1.21114	0.561348	0.472438
hsa-miR-190b	-0.193655	-1.28197	0.89466	0.727272	-0.134876	-1.13718	0.867427	0.791977	1.00405	0.0875999	1.9205	0.0317686	0.688156	-0.288083	1.6644	0.167098
hsa-miR-191-5p	-0.362192	-0.858314	0.13393	0.152469	-0.324955	-0.854554	0.204645	0.229129	-0.297265	-0.747787	0.153256	0.195931	-0.339547	-0.755218	0.0761234	0.109371
hsa-miR-193a-3p	0.0484383	-0.844701	0.941577	0.915347	-0.0507029	-0.956884	0.855478	0.912676	0.130622	-0.903505	1.16475	0.80447	0.262999	-0.811247	1.33724	0.63134
hsa-miR-193a-5p	-0.0691565	-0.652233	0.51392	0.816178	0.00739238	-0.536758	0.551543	0.978758	1.15322	0.530731	1.7757	0.000282296	1.08753	0.356312	1.81875	0.00355658
hsa-miR-193b-3p	-0.117922	-0.812269	0.576424	0.739237	-0.140634	-0.85251	0.571242	0.698609	0.500988	-0.189486	1.19146	0.154999	0.448543	-0.28581	1.1829	0.231249
hsa-miR-194-5p	-0.14129	-0.829698	0.547118	0.687488	0.184747	-0.598847	0.968341	0.644011	-0.255542	-1.43652	0.925442	0.671495	-0.416404	-1.7299	0.897091	0.534371
hsa-miR-195-5p	0.00771681	-0.837214	0.852648	0.985718	0.198346	-0.593963	0.990655	0.62367	0.809347	-0.64962	2.26831	0.276917	0.253834	-0.876683	1.38435	0.659887
hsa-miR-196b-5p	0.271002	-0.723754	1.26576	0.593373	0.714878	-0.45039	1.88015	0.229203	0.525658	-1.55492	2.60624	0.620469	0.560033	-1.17993	2.29999	0.528143
hsa-miR-19a-3p	0.0565014	-0.651122	0.764125	0.875642	0.112773	-0.62023	0.845777	0.763001	0.896988	0.25436	1.53962	0.00622402	0.737952	-0.00978148	1.48569	0.0530732
hsa-miR-19b-3p	-0.217421	-0.83212	0.397278	0.488156	-0.183219	-0.751398	0.38496	0.527371	0.750806	0.239183	1.26243	0.00402438	0.627081	0.0616045	1.19256	0.0297437
hsa-miR-200a-3p	-0.211602	-0.730549	0.307344	0.424185	-0.265541	-0.760765	0.229682	0.293285	0.0898703	-0.54358	0.723321	0.78096	-0.113222	-0.780087	0.553642	0.739309
hsa-miR-200c-3p	0.0782559	-0.720109	0.876621	0.847651	0.233573	-0.518775	0.985922	0.542864	0.382126	-0.898803	1.66305	0.558753	0.0840345	-1.10018	1.26825	0.889384
hsa-miR-203a	0.00627025	-0.500647	0.513188	0.980658	0.00221899	-0.545371	0.549809	0.993663	-0.0960505	-0.877841	0.68574	0.80971	-0.202207	-1.0921	0.687683	0.656062
hsa-miR-205-5p	0.113803	-0.64798	0.875587	0.769675	0.29364	-0.469609	1.05689	0.450822	0.658206	-0.478399	1.79481	0.25637	0.428977	-0.605743	1.4637	0.416466
hsa-miR-206	-0.352841	-1.63309	0.92741	0.589078	-0.247481	-1.48649	0.991529	0.695439	-0.597121	-2.66915	1.47491	0.572192	-0.538486	-2.80655	1.72958	0.641691
hsa-miR-20a-3p	-0.395251	-1.32218	0.53168	0.403299	-0.0560878	-0.961858	0.849683	0.903401	0.132515	-1.48644	1.75147	0.872545	-0.344997	-2.07851	1.38852	0.696489
hsa-miR-20a-5p	-0.0636451	-0.807809	0.680519	0.866877	0.0156787	-0.759069	0.790427	0.968361	0.708637	-0.585445	2.00272	0.283149	0.297269	-1.19967	1.79421	0.697115
hsa-miR-21-5p	0.3575	-0.752636	1.46764	0.527928	0.183182	-0.970543	1.33691	0.755655	0.830332	-0.167743	1.82841	0.102983	0.400176	-0.752922	1.55327	0.496381
hsa-miR-210-3p	0.0524281	-0.439712	0.544568	0.834607	0.0987432	-0.452146	0.649632	0.725355	0.668292	-0.2623	1.59888	0.159273	0.659235	-0.213533	1.532	0.138757
hsa-miR-212-3p	-0.00682792	-0.659516	0.645861	0.983642	0.13513	-0.582181	0.852441	0.711959	0.472743	-0.872804	1.81829	0.491068	0.658278	-0.31547	1.63203	0.185176
hsa-miR-218-5p	0.211812	-0.4549	0.878525	0.533498	0.101936	-0.560169	0.764042	0.762841	0.818234	0.199253	1.43722	0.00957294	0.746462	0.131304	1.36162	0.0173921
hsa-miR-22-3p	0.176832	-0.685248	1.03891	0.68766	0.174468	-0.703734	1.05267	0.696997	0.346042	-0.858467	1.55055	0.573383	-0.00592699	-1.31014	1.29829	0.992893
hsa-miR-222-3p	-0.671746	-1.67322	0.329728	0.188624	-0.475833	-1.32369	0.372024	0.271346	0.104855	-1.21164	1.42135	0.87595	-0.0800591	-1.07669	0.916575	0.874896
hsa-miR-223-3p	0.12345	-1.02303	1.26993	0.832852	0.174209	-0.900954	1.24937	0.750809	0.668923	-0.496742	1.83459	0.260701	0.513114	-0.562359	1.58859	0.349732
hsa-miR-224-5	-0.0955389	-0.796982	0.605904	0.789505	-0.0935895	-0.865404	0.678225	0.812142	1.03203	0.377215	1.68684	0.00200811	0.908249	0.26665	1.54985	0.00552814
hsa-miR-24-3p	0.0944483	-0.371662	0.560559	0.691257	0.0744303	-0.361332	0.510192	0.737798	0.597447	0.0921759	1.10272	0.0204756	0.679833	0.193326	1.16634	0.00616634
hsa-miR-25-3p	-0.122922	-0.724764	0.478921	0.68893	-0.13768	-0.77706	0.5017	0.672992	0.751369	0.0456193	1.45712	0.0369193	0.685436	-0.10924	1.48011	0.0909252
hsa-miR-26a-5p	0.0450815	-0.651862	0.742025	0.899115	0.10565	-0.56327	0.774569	0.756897	0.0922914	-1.10127	1.28585	0.879539	-0.00490537	-0.790438	0.780627	0.990235
hsa-miR-26b-5p	-0.147351	-0.936394	0.641692	0.714353	-0.117634	-0.951231	0.715963	0.782102	0.292067	-0.735527	1.31966	0.57748	0.181511	-0.611176	0.974197	0.653579
hsa-miR-27a-3p	0.15344	-0.593588	0.900467	0.687259	0.215328	-0.50346	0.934116	0.557104	0.767174	0.0909055	1.44344	0.0261871	0.822576	-0.00551235	1.65066	0.0515447
hsa-miR-27a-5p	-0.199811	-1.00343	0.603804	0.626027	-0.215421	-1.00416	0.573313	0.592435	-0.486476	-1.39023	0.417282	0.29142	-0.467438	-1.41817	0.483289	0.335225
hsa-miR-27b-3p	-0.0798787	-0.849847	0.69009	0.838875	0.0458363	-0.681979	0.773652	0.901763	1.02717	0.394074	1.66026	0.00147295	0.830039	0.00431285	1.65577	0.0488153
hsa-miR-28-5p	-0.306327	-0.891376	0.278721	0.304786	-0.285812	-0.863646	0.292022	0.332321	0.265585	-0.777574	1.30874	0.617779	0.238597	-0.511759	0.988953	0.533136
hsa-miR-29a-3p	-0.1253	-0.796197	0.545596	0.714325	-0.161745	-0.912614	0.589125	0.672882	-0.272567	-0.932906	0.387773	0.41851	-0.348754	-1.03912	0.34161	0.322114
hsa-miR-29a-5p	-0.512996	-1.10874	0.0827459	0.0914623	-0.663254	-1.34117	0.0146616	0.0551649	-0.103243	-1.18792	0.981437	0.85201	-0.120576	-1.48123	1.24008	0.862113
hsa-miR-29b-3p	-0.562794	-1.30488	0.179296	0.137169	-0.711684	-1.50131	0.0779454	0.0773131	-0.235368	-0.891132	0.420396	0.481761	-0.260028	-1.08604	0.56598	0.537235
hsa-miR-29c-5p	-0.120631	-0.86164	0.620378	0.749675	-0.102513	-0.860007	0.65498	0.790819	0.310387	-0.678028	1.2988	0.53824	0.234016	-0.932733	1.40076	0.694237
hsa-miR-30a-3p	-0.0965843	-0.572268	0.3791	0.690662	-0.126209	-0.617184	0.364765	0.614384	0.25314	-0.289908	0.796189	0.360911	0.152895	-0.410424	0.716215	0.594746
hsa-miR-30a-5p	-0.00746904	-0.758757	0.743819	0.984454	-0.0292989	-0.745329	0.686731	0.936079	0.443983	-0.284476	1.17244	0.232258	0.40423	-0.242117	1.05058	0.220283
hsa-miR-30b-5p	-0.0364439	-0.985806	0.912918	0.940025	-0.0626033	-0.862722	0.737515	0.87812	0.404908	-1.36872	2.17854	0.654553	0.266887	-0.715033	1.24881	0.594227
hsa-miR-30c-5p	0.569614	-0.572519	1.71175	0.328327	0.952278	-0.500337	2.40489	0.198836	0.989384	-0.809605	2.78837	0.281072	0.771551	-0.670036	2.21314	0.294182
hsa-miR-30d-3p	-0.365109	-1.05568	0.325464	0.30009	-0.521575	-1.10854	0.0653865	0.0815737	-0.656901	-2.1224	0.808593	0.379648	-0.551062	-2.33439	1.23227	0.544751
hsa-miR-30d-5p	0.0375896	-0.838183	0.913362	0.932957	0.121608	-0.680177	0.923394	0.766259	0.269891	-0.897638	1.43742	0.650496	0.217969	-0.745827	1.18177	0.657579
hsa-miR-30e-3p	0.108309	-0.423085	0.639703	0.689539	0.102253	-0.422756	0.627263	0.702661	0.136864	-0.818583	1.09231	0.778896	-0.113651	-0.808353	0.581051	0.748481
hsa-miR-31-3p	0.751731	-0.536536	2.04	0.252756	0.750835	-0.633343	2.13501	0.287707	0.152454	-1.79356	2.09847	0.877967	-0.0655613	-2.58413	2.45301	0.959309
hsa-miR-320a	-0.0252048	-0.583949	0.533539	0.929548	0.0737737	-0.502971	0.650519	0.802041	0.168289	-0.394037	0.730614	0.557497	0.0403049	-0.533246	0.613856	0.890452
hsa-miR-320b	-0.565321	-1.53445	0.403805	0.252911	-0.761969	-1.74282	0.218879	0.127861	1.00823	0.350629	1.66584	0.00265579	0.662081	-0.407227	1.73139	0.224921
hsa-miR-324-3p	-0.261977	-0.780883	0.256929	0.322411	-0.0702882	-0.562416	0.421839	0.77953	0.453012	0.0287932	0.877232	0.0363498	0.406028	-0.125689	0.937745	0.134481
hsa-miR-324-5p	-0.191459	-0.731915	0.348997	0.487478	-0.194589	-0.878339	0.489161	0.576989	0.391808	-0.141925	0.92554	0.15021	0.391826	-0.241948	1.0256	0.225614
hsa-miR-328-3p	0.0251969	-0.592915	0.643309	0.936319	-0.178102	-0.796805	0.440601	0.572616	0.53754	-0.451987	1.52707	0.287007	0.635618	-0.397021	1.66826	0.227659
hsa-miR-331-3p	-0.198161	-0.721188	0.324867	0.457739	-0.219365	-0.721546	0.282816	0.391909	0.252092	-0.480319	0.984503	0.499924	0.183638	-0.627555	0.99483	0.657262
hsa-miR-335-5p	-0.211747	-1.00956	0.586064	0.602928	-0.110907	-0.842567	0.620753	0.766393	0.734421	0.0531456	1.4157	0.0346129	0.691023	-0.0609368	1.44298	0.0716818
hsa-miR-340-5p	-0.0848313	-1.21525	1.04558	0.883065	-0.169866	-1.39111	1.05138	0.785148	0.72925	-0.827907	2.28641	0.358675	0.670677	-0.798808	2.14016	0.371037
hsa-miR-345-5p	-0.243971	-0.7902	0.302258	0.381351	-0.451243	-0.954923	0.0524375	0.079103	-0.0435168	-1.1809	1.09386	0.940223	-0.152597	-1.65836	1.35317	0.842555
hsa-miR-34a-5p	-0.2673	-1.21119	0.676593	0.578867	-0.448808	-1.6173	0.719685	0.451567	0.659462	-0.213445	1.53237	0.138684	0.512517	-0.704346	1.72938	0.409091
hsa-miR-361-5p	-0.396531	-0.897672	0.104609	0.120941	-0.388769	-0.939095	0.161557	0.16618	0.274033	-0.556375	1.10444	0.517772	0.239564	-0.928177	1.40731	0.687618
hsa-miR-362-3p	0.0944099	-0.821928	1.01075	0.839968	-0.00463208	-0.82361	0.814346	0.991155	0.380228	-0.538792	1.29925	0.417423	0.436948	-0.470574	1.34447	0.345338
hsa-miR-365a-3p	-0.195234	-1.19231	0.801846	0.701147	-0.237379	-1.37694	0.902187	0.683073	1.16839	-0.064424	2.40121	0.0632342	0.820074	-0.718848	2.359	0.296281
hsa-miR-374a-5p	-0.144241	-0.925341	0.636859	0.717401	0.0504091	-0.74334	0.844158	0.900941	0.0645021	-1.30049	1.4295	0.926208	-0.153049	-1.14272	0.836621	0.761812
hsa-miR-374b-5p	-0.0640925	-0.897561	0.769376	0.880198	0.085302	-0.722611	0.893215	0.836057	0.477455	-1.09241	2.04732	0.551111	0.143471	-1.34509	1.63203	0.850167
hsa-miR-375	-0.0567873	-0.87794	0.764365	0.892183	-0.256299	-1.11845	0.605853	0.560126	1.16727	0.371666	1.96288	0.00403315	0.830857	-0.413079	2.07479	0.190497
hsa-miR-422a	0.447824	-0.544027	1.43968	0.376194	0.404784	-0.672533	1.4821	0.461473	0.198384	-1.33648	1.73325	0.800014	-0.403983	-2.12085	1.31288	0.644666
hsa-miR-429	-0.0324421	-0.861909	0.797025	0.938896	-0.0357405	-0.826876	0.755395	0.929445	0.767014	-0.709234	2.24326	0.308517	0.390387	-0.524833	1.30561	0.403142
hsa-miR-452-5p	0.24483	-0.412909	0.902569	0.465661	0.239718	-0.523825	1.00326	0.53833	0.881953	0.0621841	1.70172	0.0349758	0.715869	-0.214905	1.64664	0.1317
hsa-miR-483-5	-1.17231	-2.15552	-0.189098	0.0194435	-1.07926	-2.26791	0.109382	0.0751409	-1.06881	-3.69436	1.55674	0.42495	-1.75179	-4.86831	1.36474	0.270597
hsa-miR-484	0.0363328	-0.576742	0.649407	0.90753	0.0491907	-0.620076	0.718457	0.885456	0.782892	0.0990327	1.46675	0.0248456	0.748301	-0.138517	1.63512	0.0981627
hsa-miR-502-3p	0.146219	-0.797604	1.09004	0.761401	0.0330876	-0.892909	0.959084	0.944167	0.0105121	-1.48141	1.50244	0.988982	-0.00723314	-2.26074	2.24627	0.994981
hsa-miR-511-5p	-0.332735	-1.36628	0.700809	0.528052	-0.321023	-1.29002	0.647974	0.516129	0.610917	-0.309153	1.53099	0.193123	0.521984	-0.474449	1.51842	0.304547
hsa-miR-532-3p	0.185564	-0.545172	0.9163	0.618684	0.392891	-0.287695	1.07348	0.257864	0.370078	-0.694545	1.4347	0.495675	0.380574	-0.587647	1.34879	0.441066
hsa-miR-532-5p	0.457597	-0.100316	1.01551	0.107934	0.436544	-0.170656	1.04374	0.158803	0.560967	-0.0682309	1.19016	0.0805639	0.437612	-0.198017	1.07324	0.177216
hsa-miR-548am-5p	0.237696	-0.817753	1.29315	0.658923	0.200008	-0.822262	1.22228	0.701372	0.22305	-1.71241	2.15851	0.821299	0.279842	-1.76877	2.32845	0.788905
hsa-miR-548b-5	0.0660534	-1.09972	1.23183	0.911575	0.443686	-0.842478	1.72985	0.498961	0.15865	-2.26007	2.57737	0.897707	0.310057	-1.83206	2.45217	0.776647
hsa-miR-548d-5	-0.248841	-0.997338	0.499656	0.51466	-0.230793	-1.01651	0.554928	0.564812	-0.514326	-2.00971	0.981062	0.50024	-0.407331	-1.93453	1.11987	0.601143
hsa-miR-574-3p	-0.282952	-0.93015	0.364246	0.391508	-0.401313	-1.04493	0.242308	0.221676	-0.405194	-1.64691	0.836516	0.522449	-0.651822	-1.84472	0.541078	0.284188
hsa-miR-590-3p	0.165942	-0.679737	1.01162	0.700541	0.20204	-0.676325	1.08041	0.652113	0.477871	-0.913252	1.86899	0.500772	0.121762	-1.52264	1.76616	0.884609
hsa-miR-590-5p	0.215801	-0.536151	0.967753	0.573786	0.795514	-0.719506	2.31053	0.30341	0.156329	-0.912111	1.22477	0.774286	0.616114	-1.56629	2.79852	0.580047
hsa-miR-598-3p	-0.0477355	-0.868374	0.772903	0.909231	0.0163735	-0.931138	0.963885	0.972982	0.564881	-0.699785	1.82955	0.381331	0.318384	-1.07112	1.70789	0.653363
hsa-miR-622	-0.408034	-1.62096	0.804893	0.509677	-0.121903	-1.29238	1.04858	0.838254	1.57516	0.215586	2.93473	0.0231619	1.34227	0.0597447	2.62479	0.040241
hsa-miR-628-5p	-0.619002	-1.54555	0.307542	0.190397	-0.299014	-1.15958	0.561553	0.495864	0.0722591	-0.962202	1.10672	0.891104	0.00339651	-0.955125	0.961918	0.994459
hsa-miR-629-3p	-0.597336	-1.30607	0.111401	0.0985564	-0.529856	-1.12168	0.0619698	0.0793043	-0.368732	-1.44574	0.708273	0.502202	-0.175208	-0.938125	0.587709	0.652627
hsa-miR-642a-5p	0.189779	-0.839186	1.21874	0.717734	-0.0502099	-1.20856	1.10814	0.932296	-0.332735	-2.94368	2.27822	0.802762	-0.321191	-2.44566	1.80328	0.766986
hsa-miR-645	0.723978	-0.619714	2.06767	0.290957	0.618635	-0.800682	2.03795	0.392946	1.33505	-0.885954	3.55605	0.238742	1.4538	-0.4425	3.3501	0.13294
hsa-miR-660-5p	-7.38846e-05	-0.527268	0.52712	0.999781	0.0352388	-0.571973	0.64245	0.90944	0.392889	-0.119853	0.90563	0.133142	0.375362	-0.127034	0.877758	0.143092
hsa-miR-661	0.386218	-0.448623	1.22106	0.364551	0.310102	-0.521782	1.14199	0.465013	0.498824	-1.99169	2.98934	0.694644	0.192074	-1.7134	2.09755	0.843385
hsa-miR-744-5p	0.0684994	-0.471703	0.608701	0.803724	0.132036	-0.466908	0.73098	0.665691	0.0441396	-2.19772	2.286	0.969218	-0.0350396	-2.69632	2.62624	0.979412
hsa-miR-885-5p	-0.114818	-1.32775	1.09812	0.852811	0.0618038	-1.05816	1.18177	0.91387	0.338165	-0.778603	1.45493	0.552853	0.226824	-1.19391	1.64756	0.754346
hsa-miR-886-3p(15)	0.489006	-0.784383	1.7624	0.451652	0.543986	-0.861993	1.94996	0.448255	1.28974	-1.67387	4.25335	0.393681	1.31386	-1.0309	3.65861	0.2721
hsa-miR-92a-3p	-0.06312	-0.906414	0.780174	0.883367	-0.0498014	-0.885075	0.785472	0.906972	0.935074	0.0417017	1.82845	0.0402228	0.758568	-0.709677	2.22681	0.311244
hsa-miR-942-5p	-0.0540914	-0.648389	0.540206	0.858416	-0.0625469	-0.814123	0.689029	0.870432	0.120185	-1.06375	1.30412	0.842293	0.170701	-0.746844	1.08825	0.715385
hsa-miR-99a-5p	-0.411757	-0.959812	0.136298	0.140877	-0.347077	-0.934489	0.240336	0.24684	0.0895536	-0.77234	0.951448	0.83863	-0.129848	-0.895801	0.636106	0.739692
hsa-miR-99b-5p	-0.0894103	-0.562766	0.383946	0.711226	-0.0224345	-0.529763	0.484894	0.930933	0.310975	-0.293542	0.915492	0.313338	0.223317	-0.524978	0.971612	0.558601
